# Supplementary material for: RWRMDA: predicting novel human microRNA–disease associations
Source: Royal Society of Chemistry journal article supplement (doi:10.1039/c2mb25180a), 2012-07-04
Supplement: c2mb25180a.xlsx [file c2mb25180a.xlsx]

## Sheet: miRNA functional similarity
1	0.0553	0	0.2082	0.1875	0.15	0	0.1256	0	0	0.054	0.0592	0.0235	0.1186	0.0909	0.1228	0.1557	0.0928	0.0213	0.1194	0.1007	0.1566	0.2037	0.0344	0.2104	0	0.1758	0.2093	0	0	0.1296	0.0167	0.1362	0.1355	0.1392	0	0.0417	0	0.2195	0.0606	0	0.0588	0.2987	0	0.0732	0.0294	0.2817	0.0619	0.1621	0.0956
0.0553	1	0	0.0259	0.1051	0.2634	0.0303	0.287	0	0.4	0.2088	0.3003	0.0134	0.4568	0.4136	0.2345	0.0333	0.4136	0.0336	0.2427	0.4022	0.1924	0.1149	0.0558	0.123	0	0.1373	0.0278	0	0	0.2449	0.0403	0.306	0.2933	0.1807	0	0.3087	0	0.2341	0.678	0	0.0327	0.2357	0	0.0419	0.0143	0.0987	0.3447	0.1738	0.2032
0	0	1	0	0	0	0	0.3333	0	0	0.0794	0	0.6667	0	0	0.0099	0	0	0	0.25	0	0.5	0	0.4109	0	1	0	0	1	0	0	0	0	0.3333	0	0	0.0272	0	0	0	0	0.6667	0.1429	1	0	0.0545	0	0	0	0.1538
0.2082	0.0259	0	1	0.1496	0.1392	0	0.0283	0	0	0.0408	0.0255	0.0112	0.0937	0.0425	0.0839	0.3957	0.0435	0.0135	0.0556	0.0769	0.1269	0.2657	0.0172	0.2773	0	0.1751	0.0233	0	0	0.0589	0.0079	0.0313	0.0641	0.2145	0	0.0159	0	0.1789	0.0283	0	0.0274	0.2486	0	0.0596	0.018	0.2129	0.029	0.0953	0.0655
0.1875	0.1051	0	0.1496	1	0.3652	0.0588	0.0855	0.0882	0	0.2632	0.1154	0.0457	0.1886	0.1724	0.2817	0.1075	0.1765	0.0366	0.3009	0.1631	0.5857	0.3062	0.0194	0.3414	0	0.1827	0.1414	0	0.0882	0.12	0.0321	0.1387	0.3717	0.2244	0.0882	0.0817	0.0882	0.3429	0.1149	0.0882	0.1111	0.2862	0	0.1143	0.0484	0.2578	0.1471	0.2068	0.2249
0.15	0.2634	0	0.1392	0.3652	1	0.0196	0.1519	0.0221	0	0.2472	0.3281	0.2219	0.2303	0.1186	0.5098	0.2925	0.3274	0.0926	0.3993	0.4191	0.3599	0.6176	0.0578	0.5989	0	0.5882	0.0985	0	0.0221	0.4175	0.0858	0.1683	0.3112	0.5414	0.0221	0.1208	0.0221	0.2427	0.1054	0.0221	0.2997	0.5039	0	0.229	0.0691	0.4831	0.3008	0.2722	0.4605
0	0.0303	0	0	0.0588	0.0196	1	0.026	0.6667	0.0606	0.0335	0	0	0	0	0.0541	0	0	0.0231	0.0196	0	0.0353	0.0294	0.1667	0.016	0	0.0288	0	0	0.6667	0	0	0	0.0512	0.0084	0.6667	0	0.6667	0	0.0454	0.6667	0	0.0253	0	0	0	0.0118	0.5	0	0.0559
0.1256	0.287	0.3333	0.0283	0.0855	0.1519	0.026	1	0	0.3333	0.4225	0.0498	0.3483	0.1658	0.0809	0.2107	0.0458	0.0396	0.1767	0.2673	0.1756	0.4276	0.2702	0.3618	0.2833	0.3333	0.2796	0.0864	0.3333	0	0.0754	0.2822	0.1132	0.5111	0.3364	0	0.131	0	0.2041	0.355	0	0.3179	0.3868	0.3333	0.2147	0.1559	0.2466	0.034	0.1803	0.4665
0	0	0	0	0.0882	0.0221	0.6667	0	1	0	0.0221	0	0	0	0	0.016	0	0	0	0.0221	0	0.0441	0.016	0	0.0176	0	0.0071	0	0	1	0	0	0	0.0294	0.0088	1	0	1	0	0	1	0	0.0126	0	0	0	0.0126	0.6667	0	0.0162
0	0.4	0	0	0	0	0.0606	0.3333	0	1	0.1902	0	0	0	0	0.0128	0	0	0.0319	0	0	0	0.0075	0.075	0	0	0.0053	0	0	0	0	0	0	0.3333	0	0	0	0	0	0.6667	0	0	0.0061	0	0	0	0	0	0	0.0103
0.054	0.2088	0.0794	0.0408	0.2632	0.2472	0.0335	0.4225	0.0221	0.1902	1	0.0568	0.1155	0.1122	0.0483	0.4597	0.0583	0.0495	0.1125	0.3713	0.126	0.3048	0.2289	0.2537	0.2499	0.0794	0.2668	0.0464	0.0794	0.0221	0.0869	0.2902	0.0712	0.3786	0.3008	0.0221	0.2863	0.0221	0.1013	0.212	0.0221	0.1096	0.2717	0.0794	0.1568	0.2545	0.2069	0.0538	0.0952	0.4507
0.0592	0.3003	0	0.0255	0.1154	0.3281	0	0.0498	0	0	0.0568	1	0.0411	0.1399	0.0423	0.4153	0.3659	0.5084	0.0515	0.2903	0.0935	0.1218	0.1498	0.0288	0.1572	0	0.234	0.0628	0	0	0.2944	0.032	0.1042	0.1349	0.2868	0	0.0512	0	0.1386	0.0338	0	0.0327	0.2582	0	0.1681	0.0505	0.1401	0.4067	0.106	0.2249
0.0235	0.0134	0.6667	0.0112	0.0457	0.2219	0	0.3483	0	0	0.1155	0.0411	1	0.0557	0.0175	0.1095	0.0274	0.018	0.0507	0.2621	0.4714	0.4476	0.0909	0.3599	0.2386	0.6667	0.1696	0.0355	0.6667	0	0.3056	0.0358	0.0546	0.3332	0.1511	0	0.0532	0	0.0565	0.0132	0	0.5127	0.227	0.6667	0.3955	0.0712	0.0844	0.0135	0.0445	0.2397
0.1186	0.4568	0	0.0937	0.1886	0.2303	0	0.1658	0	0	0.1122	0.1399	0.0557	1	0.2463	0.2221	0.1223	0.1124	0.057	0.1523	0.6099	0.4046	0.3568	0.0305	0.3219	0	0.1948	0.3165	0	0	0.2741	0.0774	0.5849	0.1381	0.2815	0	0.554	0	0.5212	0.1971	0	0.084	0.3356	0	0.1628	0.0534	0.3575	0.0899	0.5168	0.1721
0.0909	0.4136	0	0.0425	0.1724	0.1186	0	0.0809	0	0	0.0483	0.0423	0.0175	0.2463	1	0.0957	0.0391	0.0682	0.0176	0.0656	0.201	0.2828	0.1145	0.0094	0.1289	0	0.0679	0.0457	0	0	0.0449	0.0123	0.518	0.0761	0.1098	0	0.0284	0	0.4795	0.6667	0	0.043	0.1433	0	0.0685	0.0236	0.0977	0.0455	0.2512	0.074
0.1228	0.2345	0.0099	0.0839	0.2817	0.5098	0.0541	0.2107	0.016	0.0128	0.4597	0.4153	0.1095	0.2221	0.0957	1	0.2532	0.2477	0.2394	0.6484	0.2255	0.2964	0.4973	0.1953	0.4926	0.0099	0.591	0.1069	0.0099	0.016	0.2681	0.3026	0.1688	0.4847	0.6566	0.016	0.2754	0.016	0.1946	0.0939	0.016	0.1042	0.5497	0.0099	0.1895	0.2194	0.499	0.2344	0.1923	0.6119
0.1557	0.0333	0	0.3957	0.1075	0.2925	0	0.0458	0	0	0.0583	0.3659	0.0274	0.1223	0.0391	0.2532	1	0.04	0.1337	0.1	0.0922	0.1157	0.3456	0.0327	0.2498	0	0.3178	0.0436	0	0	0.0922	0.0221	0.0761	0.111	0.3786	0	0.0392	0	0.1275	0.0326	0	0.0316	0.2673	0	0.1001	0.0323	0.2246	0.0333	0.1027	0.0984
0.0928	0.4136	0	0.0435	0.1765	0.3274	0	0.0396	0	0	0.0495	0.5084	0.018	0.1124	0.0682	0.2477	0.04	1	0.0181	0.2863	0.0939	0.1498	0.1059	0.0096	0.1195	0	0.1353	0.0466	0	0	0.356	0.0126	0.0525	0.0778	0.1705	0	0.029	0	0.2113	0.0455	0	0.0439	0.2297	0	0.0704	0.024	0.0911	0.6667	0.1173	0.2025
0.0213	0.0336	0	0.0135	0.0366	0.0926	0.0231	0.1767	0	0.0319	0.1125	0.0515	0.0507	0.057	0.0176	0.2394	0.1337	0.0181	1	0.0425	0.0638	0.0416	0.088	0.1395	0.0922	0	0.2015	0.0401	0	0	0.057	0.1626	0.0615	0.0645	0.237	0	0.1279	0	0.0441	0.0396	0	0.0136	0.1172	0	0.1323	0.1721	0.0848	0.0144	0.0428	0.1509
0.1194	0.2427	0.25	0.0556	0.3009	0.3993	0.0196	0.2673	0.0221	0	0.3713	0.2903	0.2621	0.1523	0.0656	0.6484	0.1	0.2863	0.0425	1	0.1473	0.4821	0.3673	0.2574	0.3878	0.25	0.3696	0.0788	0.25	0.0221	0.2878	0.2338	0.1014	0.6814	0.416	0.0221	0.0973	0.0221	0.1455	0.0583	0.0221	0.3029	0.5251	0.25	0.0916	0.0426	0.4494	0.2643	0.1459	0.5975
0.1007	0.4022	0	0.0769	0.1631	0.4191	0	0.1756	0	0	0.126	0.0935	0.4714	0.6099	0.201	0.2255	0.0922	0.0939	0.0638	0.1473	1	0.3576	0.2541	0.035	0.4281	0	0.274	0.084	0	0	0.3908	0.0758	0.1986	0.1336	0.3176	0	0.3644	0	0.4321	0.1675	0	0.0732	0.3025	0	0.3717	0.056	0.228	0.0783	0.3323	0.1953
0.1566	0.1924	0.5	0.1269	0.5857	0.3599	0.0353	0.4276	0.0441	0	0.3048	0.1218	0.4476	0.4046	0.2828	0.2964	0.1157	0.1498	0.0416	0.4821	0.3576	1	0.3466	0.3082	0.3802	0.5	0.2058	0.1182	0.5	0.0441	0.1293	0.0367	0.2303	0.5762	0.3	0.0441	0.0956	0.0441	0.5857	0.2263	0.0441	0.5123	0.5015	0.5	0.1	0.053	0.2993	0.1375	0.4181	0.3731
0.2037	0.1149	0	0.2657	0.3062	0.6176	0.0294	0.2702	0.016	0.0075	0.2289	0.1498	0.0909	0.3568	0.1145	0.4973	0.3456	0.1059	0.088	0.3673	0.2541	0.3466	1	0.0661	0.6742	0	0.5588	0.1888	0	0.016	0.319	0.0768	0.3011	0.3976	0.5837	0.016	0.2635	0.016	0.2589	0.1084	0.016	0.1241	0.5456	0	0.1678	0.0634	0.7804	0.1044	0.3242	0.4388
0.0344	0.0558	0.4109	0.0172	0.0194	0.0578	0.1667	0.3618	0	0.075	0.2537	0.0288	0.3599	0.0305	0.0094	0.1953	0.0327	0.0096	0.1395	0.2574	0.035	0.3082	0.0661	1	0.0712	0.4109	0.1546	0.0222	0.4109	0	0.2649	0.0912	0.034	0.2931	0.1439	0	0.2456	0	0.0218	0.0704	0	0.3463	0.2155	0.4109	0.0654	0.4109	0.0906	0.008	0.0236	0.2739
0.2104	0.123	0	0.2774	0.3414	0.5989	0.016	0.2833	0.0176	0	0.2499	0.1572	0.2386	0.3219	0.1289	0.4926	0.2498	0.1195	0.0922	0.3878	0.4281	0.3803	0.6742	0.0712	1	0	0.6052	0.1599	0	0.0176	0.4451	0.0826	0.2455	0.4161	0.6131	0.0176	0.1746	0.0176	0.2906	0.1172	0.0176	0.2847	0.5195	0	0.226	0.0676	0.6795	0.1167	0.2947	0.4463
0	0	1	0	0	0	0	0.3333	0	0	0.0794	0	0.6667	0	0	0.0099	0	0	0	0.25	0	0.5	0	0.4109	0	1	0	0	1	0	0	0	0	0.3333	0	0	0.0272	0	0	0	0	0.6667	0.1429	1	0	0.0545	0	0	0	0.1538
0.1758	0.1373	0	0.1751	0.1827	0.5882	0.0288	0.2796	0.0071	0.0053	0.2668	0.234	0.1696	0.1948	0.0679	0.591	0.3178	0.1353	0.2015	0.3696	0.274	0.2058	0.5588	0.1546	0.6052	0	1	0.0957	0	0.0071	0.3466	0.2411	0.1551	0.3284	0.8902	0.0071	0.1686	0.0071	0.156	0.0704	0.0071	0.1438	0.5713	0	0.224	0.1272	0.605	0.1335	0.2472	0.5572
0.2093	0.0278	0	0.0233	0.1414	0.0985	0	0.0864	0	0	0.0464	0.0628	0.0355	0.3165	0.0457	0.1069	0.0436	0.0466	0.0401	0.0788	0.084	0.1182	0.1888	0.0222	0.1599	0	0.0957	1	0	0	0.1763	0.0251	0.649	0.0974	0.1126	0	0.1659	0	0.1656	0.0305	0	0.0295	0.2387	0	0.1656	0.0554	0.2917	0.0311	0.5414	0.0778
0	0	1	0	0	0	0	0.3333	0	0	0.0794	0	0.6667	0	0	0.0099	0	0	0	0.25	0	0.5	0	0.4109	0	1	0	0	1	0	0	0	0	0.3333	0	0	0.0272	0	0	0	0	0.6667	0.1429	1	0	0.0545	0	0	0	0.1538
0	0	0	0	0.0882	0.0221	0.6667	0	1	0	0.0221	0	0	0	0	0.016	0	0	0	0.0221	0	0.0441	0.016	0	0.0176	0	0.0071	0	0	1	0	0	0	0.0294	0.0088	1	0	1	0	0	1	0	0.0126	0	0	0	0.0126	0.6667	0	0.0162
0.1296	0.2449	0	0.0589	0.12	0.4175	0	0.0754	0	0	0.0869	0.2944	0.3056	0.2741	0.0449	0.2681	0.0922	0.356	0.057	0.2878	0.3908	0.1293	0.319	0.2649	0.4451	0	0.3466	0.1763	0	0	1	0.0389	0.2792	0.1085	0.3534	0	0.3159	0	0.1429	0.0385	0	0.0715	0.3146	0	0.2657	0.0496	0.4045	0.3052	0.1902	0.2407
0.0167	0.0403	0	0.0079	0.0321	0.0858	0	0.2822	0	0	0.2902	0.032	0.0358	0.0774	0.0123	0.3026	0.0221	0.0126	0.1626	0.2338	0.0758	0.0367	0.0768	0.0912	0.0826	0	0.2411	0.0251	0	0	0.0389	1	0.0424	0.039	0.2283	0	0.1491	0	0.0391	0.0099	0	0.0095	0.1539	0	0.1172	0.1595	0.0727	0.0101	0.0344	0.3408
0.1362	0.306	0	0.0313	0.1387	0.1683	0	0.1132	0	0	0.0712	0.1042	0.0546	0.5849	0.518	0.1688	0.0761	0.0525	0.0615	0.1014	0.1986	0.2303	0.3011	0.034	0.2455	0	0.1551	0.649	0	0	0.2792	0.0424	1	0.1182	0.2044	0	0.2517	0	0.3023	0.4144	0	0.0397	0.3142	0	0.1856	0.0596	0.3863	0.042	0.5849	0.1314
0.1355	0.2933	0.3333	0.0641	0.3717	0.3112	0.0512	0.5111	0.0294	0.3333	0.3786	0.1349	0.3332	0.1381	0.0761	0.4847	0.111	0.0779	0.0645	0.6814	0.1336	0.5762	0.3976	0.2931	0.4161	0.3333	0.3284	0.0974	0.3333	0.0294	0.1085	0.039	0.1182	1	0.3708	0.0294	0.09	0.0294	0.1587	0.351	0.0294	0.38	0.4785	0.3333	0.1104	0.0528	0.4384	0.0793	0.1559	0.4361
0.1392	0.1807	0	0.2145	0.2244	0.5414	0.0084	0.3364	0.0088	0	0.3008	0.2868	0.1511	0.2815	0.1098	0.6566	0.3786	0.1705	0.237	0.416	0.3176	0.3	0.5837	0.1439	0.6131	0	0.8902	0.1126	0	0.0088	0.3534	0.2283	0.2044	0.3709	1	0.0088	0.187	0.0088	0.2472	0.1045	0.0088	0.0939	0.6292	0	0.2505	0.1507	0.5953	0.1665	0.3385	0.5552
0	0	0	0	0.0882	0.0221	0.6667	0	1	0	0.0221	0	0	0	0	0.016	0	0	0	0.0221	0	0.0441	0.016	0	0.0176	0	0.0071	0	0	1	0	0	0	0.0294	0.0088	1	0	1	0	0	1	0	0.0126	0	0	0	0.0126	0.6667	0	0.0162
0.0417	0.3087	0.0272	0.0159	0.0817	0.1208	0	0.131	0	0	0.2863	0.0512	0.0532	0.554	0.0284	0.2754	0.0392	0.029	0.1279	0.0973	0.3644	0.0956	0.2635	0.2456	0.1746	0.0272	0.1686	0.1659	0.0272	0	0.3159	0.1491	0.2517	0.09	0.187	0	1	0	0.095	0.0227	0	0.0917	0.1402	0.0272	0.1225	0.4161	0.2534	0.0232	0.147	0.1616
0	0	0	0	0.0882	0.0221	0.6667	0	1	0	0.0221	0	0	0	0	0.016	0	0	0	0.0221	0	0.0441	0.016	0	0.0176	0	0.0071	0	0	1	0	0	0	0.0294	0.0088	1	0	1	0	0	1	0	0.0126	0	0	0	0.0126	0.6667	0	0.0162
0.2195	0.2341	0	0.1789	0.3429	0.2427	0	0.2041	0	0	0.1013	0.1386	0.0565	0.5212	0.4795	0.1946	0.1275	0.2113	0.0441	0.1455	0.4321	0.5857	0.2589	0.0218	0.2906	0	0.156	0.1656	0	0	0.1429	0.0391	0.3023	0.1587	0.2472	0	0.095	0	1	0.3197	0	0.1316	0.3119	0	0.1429	0.0545	0.2236	0.1409	0.5414	0.1492
0.0606	0.678	0	0.0283	0.1149	0.1054	0.0454	0.355	0	0.6667	0.212	0.0338	0.0132	0.1971	0.6667	0.0939	0.0326	0.0455	0.0396	0.0583	0.1675	0.2263	0.1084	0.0704	0.1172	0	0.0704	0.0305	0	0	0.0385	0.0099	0.4144	0.351	0.1045	0	0.0227	0	0.3197	1	0	0.0323	0.1366	0	0.0457	0.0157	0.0912	0.0341	0.2009	0.0782
0	0	0	0	0.0882	0.0221	0.6667	0	1	0	0.0221	0	0	0	0	0.016	0	0	0	0.0221	0	0.0441	0.016	0	0.0176	0	0.0071	0	0	1	0	0	0	0.0294	0.0088	1	0	1	0	0	1	0	0.0126	0	0	0	0.0126	0.6667	0	0.0162
0.0588	0.0327	0.6667	0.0274	0.1111	0.2997	0	0.3179	0	0	0.1096	0.0327	0.5127	0.084	0.043	0.1042	0.0316	0.0439	0.0136	0.3029	0.0732	0.5123	0.1241	0.3463	0.2847	0.6667	0.1438	0.0295	0.6667	0	0.0715	0.0095	0.0397	0.38	0.0939	0	0.0917	0	0.1316	0.0323	0	1	0.2315	0.6667	0.0439	0.044	0.1063	0.033	0.1205	0.2272
0.2987	0.2357	0.1429	0.2486	0.2862	0.5039	0.0253	0.3868	0.0126	0.0061	0.2717	0.2582	0.227	0.3356	0.1433	0.5497	0.2673	0.2297	0.1172	0.5251	0.3025	0.5015	0.5456	0.2155	0.5195	0.1429	0.5713	0.2387	0.1429	0.0126	0.3146	0.1539	0.3142	0.4785	0.6292	0.0126	0.1402	0.0126	0.3119	0.1366	0.0126	0.2315	1	0.1429	0.1714	0.0888	0.6333	0.2202	0.3875	0.5361
0	0	1	0	0	0	0	0.3333	0	0	0.0794	0	0.6667	0	0	0.0099	0	0	0	0.25	0	0.5	0	0.4109	0	1	0	0	1	0	0	0	0	0.3333	0	0	0.0272	0	0	0	0	0.6667	0.1429	1	0	0.0545	0	0	0	0.1538
0.0732	0.0419	0	0.0596	0.1143	0.229	0	0.2147	0	0	0.1568	0.1681	0.3955	0.1628	0.0685	0.1895	0.1001	0.0704	0.1323	0.0916	0.3717	0.1	0.1678	0.0654	0.226	0	0.224	0.1656	0	0	0.2657	0.1172	0.1856	0.1104	0.2505	0	0.1225	0	0.1429	0.0457	0	0.0439	0.1714	0	1	0.1636	0.162	0.0469	0.1185	0.2039
0.0294	0.0143	0.0545	0.018	0.0484	0.0691	0	0.1559	0	0	0.2545	0.0505	0.0712	0.0534	0.0236	0.2194	0.0323	0.024	0.1721	0.0426	0.056	0.053	0.0634	0.4109	0.0676	0.0545	0.1272	0.0554	0.0545	0	0.0496	0.1595	0.0596	0.0528	0.1507	0	0.4161	0	0.0545	0.0157	0	0.044	0.0888	0.0545	0.1636	1	0.0607	0.016	0.0413	0.1251
0.2817	0.0987	0	0.2129	0.2578	0.4831	0.0118	0.2466	0.0126	0	0.2069	0.1401	0.0844	0.3575	0.0977	0.499	0.2246	0.0911	0.0848	0.4494	0.228	0.2993	0.7804	0.0906	0.6795	0	0.605	0.2917	0	0.0126	0.4045	0.0727	0.3863	0.4384	0.5953	0.0126	0.2534	0.0126	0.2236	0.0912	0.0126	0.1063	0.6333	0	0.162	0.0607	1	0.0909	0.3799	0.4087
0.0619	0.3447	0	0.029	0.1471	0.3008	0.5	0.034	0.6667	0	0.0538	0.4067	0.0135	0.0899	0.0455	0.2344	0.0333	0.6667	0.0144	0.2643	0.0783	0.1375	0.1044	0.008	0.1167	0	0.1335	0.0311	0	0.6667	0.3052	0.0101	0.042	0.0793	0.1665	0.6667	0.0232	0.6667	0.1409	0.0341	0.6667	0.033	0.2202	0	0.0469	0.016	0.0909	1	0.0938	0.1967
0.1621	0.1738	0	0.0953	0.2068	0.2722	0	0.1803	0	0	0.0952	0.106	0.0445	0.5168	0.2512	0.1923	0.1027	0.1173	0.0428	0.1459	0.3323	0.4181	0.3242	0.0236	0.2947	0	0.2472	0.5414	0	0	0.1902	0.0344	0.5849	0.1559	0.3385	0	0.147	0	0.5414	0.2009	0	0.1205	0.3875	0	0.1185	0.0413	0.3799	0.0938	1	0.1595
0.0956	0.2032	0.1538	0.0655	0.2249	0.4605	0.0559	0.4665	0.0162	0.0103	0.4507	0.2249	0.2397	0.1721	0.074	0.6119	0.0984	0.2025	0.1509	0.5975	0.1953	0.3731	0.4388	0.2739	0.4463	0.1538	0.5572	0.0778	0.1538	0.0162	0.2407	0.3408	0.1314	0.4361	0.5552	0.0162	0.1616	0.0162	0.1492	0.0782	0.0162	0.2272	0.5361	0.1538	0.2039	0.1251	0.4087	0.1967	0.1595	1
0.3154	0.266	0	0.2756	0.1842	0.4548	0.0157	0.2843	0	0.0072	0.2809	0.2774	0.0987	0.321	0.149	0.6045	0.2867	0.2494	0.123	0.4813	0.3228	0.3002	0.4971	0.104	0.4724	0	0.5495	0.1199	0	0	0.3179	0.3106	0.2075	0.2984	0.6051	0	0.1343	0	0.3215	0.1408	0	0.097	0.8576	0	0.1767	0.0905	0.54	0.2302	0.2925	0.5004
0.1887	0.0892	0	0.1546	0.1215	0.2857	0.2	0.1235	0	0.0938	0.0853	0.0568	0.0266	0.2519	0.0448	0.1379	0.3516	0.0457	0.0806	0.0888	0.095	0.1248	0.344	0.3168	0.1903	0	0.2197	0.5114	0	0	0.1648	0.0209	0.4473	0.1453	0.2243	0	0.1181	0	0.1442	0.1108	0	0.0347	0.3044	0	0.0999	0.0336	0.3015	0.0366	0.4018	0.1463
0.1506	0.2251	0	0.2678	0.147	0.3327	0.0257	0.0852	0.0293	0	0.0913	0.2904	0.044	0.4114	0.0451	0.2815	0.2924	0.3119	0.0537	0.2565	0.1205	0.1519	0.3967	0.0567	0.4126	0	0.3498	0.4217	0	0.0293	0.5276	0.0365	0.5275	0.1291	0.4115	0.0293	0.2068	0.0293	0.1463	0.0394	0.0293	0.0382	0.4682	0	0.1391	0.0452	0.503	0.2985	0.3848	0.2377
1	0.0553	0	0.2082	0.1875	0.15	0	0.1256	0	0	0.054	0.0592	0.0235	0.1186	0.0909	0.1228	0.1557	0.0928	0.0213	0.1194	0.1007	0.1566	0.2037	0.0344	0.2104	0	0.1758	0.2093	0	0	0.1296	0.0167	0.1362	0.1355	0.1392	0	0.0417	0	0.2195	0.0606	0	0.0588	0.2987	0	0.0732	0.0294	0.2817	0.0619	0.1621	0.0956
0	0.4	0	0	0	0	0	0	0	0	0.0259	0	0	0.5	0	0.0188	0	0	0	0.0259	0.4	0	0	0	0	0	0.004	0	0	0	0	0.0517	0	0	0	0	0.5	0	0	0	0	0	0	0	0	0	0	0	0	0.0198
0.2727	0.0406	0	0.2975	0.1724	0.3254	0	0.0387	0	0	0.0483	0.0423	0.0175	0.1093	0.0667	0.0957	0.4667	0.0682	0.0176	0.0697	0.0914	0.1459	0.2766	0.026	0.1561	0	0.1673	0.0457	0	0	0.094	0.0123	0.0513	0.0761	0.2013	0	0.0284	0	0.2055	0.0445	0	0.043	0.1868	0	0.0685	0.0236	0.1324	0.0455	0.1142	0.074
0.1814	0.1728	0.0088	0.1517	0.181	0.3876	0.0282	0.4187	0.0084	0.0983	0.3188	0.1532	0.06	0.2382	0.0883	0.3688	0.2543	0.0576	0.1207	0.2644	0.1996	0.2705	0.4501	0.1196	0.4958	0.0088	0.6011	0.0885	0.0088	0.0084	0.1879	0.2332	0.1662	0.3534	0.5846	0.0084	0.1345	0.0084	0.2085	0.1782	0.0084	0.1393	0.5895	0.0088	0.1395	0.097	0.5115	0.059	0.2181	0.374
0	0	0	0	0.0882	0.0221	0.6667	0	1	0	0.0221	0	0	0	0	0.016	0	0	0	0.0221	0	0.0441	0.016	0	0.0176	0	0.0071	0	0	1	0	0	0	0.0294	0.0088	1	0	1	0	0	1	0	0.0126	0	0	0	0.0126	0.6667	0	0.0162
0.1677	0.0821	0	0.0786	0.4566	0.3647	0.0294	0.1298	0.0353	0	0.2273	0.4328	0.0654	0.1814	0.0947	0.6376	0.3477	0.0969	0.0684	0.5813	0.1581	0.3818	0.4429	0.0403	0.4694	0	0.399	0.1313	0	0.0353	0.1293	0.0527	0.1587	0.6909	0.4645	0.0353	0.1052	0.0353	0.2031	0.0789	0.0353	0.1128	0.4028	0	0.1703	0.0645	0.4805	0.0954	0.1885	0.3473
0.2781	0.4761	0.1818	0.2512	0.2722	0.5488	0.0298	0.3722	0.016	0.1818	0.3186	0.204	0.1934	0.3692	0.0658	0.3387	0.3139	0.2267	0.0412	0.4502	0.2853	0.4247	0.4653	0.2008	0.4678	0.1818	0.4583	0.2282	0.1818	0.016	0.2672	0.0391	0.2574	0.5049	0.4178	0.016	0.2473	0.016	0.1695	0.2269	0.016	0.3726	0.6373	0.1818	0.0712	0.0302	0.4813	0.2151	0.2971	0.3941
0.138	0.4251	0	0.0508	0.105	0.3249	0.0227	0.2873	0	0.2857	0.1857	0.0805	0.0388	0.4123	0.3096	0.2694	0.0925	0.0456	0.06	0.2386	0.1598	0.1766	0.5045	0.0877	0.4367	0	0.3351	0.2367	0	0	0.3415	0.0321	0.5889	0.4482	0.33	0	0.1984	0	0.2024	0.5209	0	0.0909	0.2632	0	0.1163	0.0384	0.5428	0.0399	0.3461	0.2396
0.1271	0.1584	0	0.1747	0.2154	0.5443	0.0088	0.3168	0.0093	0	0.311	0.2907	0.1566	0.2184	0.0801	0.6662	0.3359	0.1687	0.246	0.4168	0.259	0.2378	0.5578	0.1484	0.5874	0	0.8801	0.1106	0	0.0093	0.3568	0.2374	0.1825	0.3698	0.962	0.0093	0.189	0.0093	0.1757	0.0761	0.0093	0.0891	0.5825	0	0.2587	0.1572	0.5724	0.1647	0.2781	0.5609
0.0915	0.2597	0	0.1618	0.1179	0.4235	0	0.3667	0	0	0.3724	0.2919	0.1658	0.3056	0.0669	0.5899	0.2602	0.1654	0.2689	0.3131	0.3501	0.1492	0.3909	0.1636	0.4724	0	0.7692	0.0968	0	0	0.3643	0.3687	0.1736	0.1516	0.8351	0	0.3081	0	0.1464	0.0632	0	0.0697	0.4734	0	0.2831	0.1778	0.422	0.1562	0.2628	0.5678
0.1362	0.306	0	0.0313	0.1387	0.1683	0	0.1132	0	0	0.0712	0.1042	0.0546	0.5849	0.518	0.1688	0.0761	0.0525	0.0615	0.1014	0.1986	0.2303	0.3011	0.034	0.2455	0	0.1551	0.649	0	0	0.2792	0.0424	1	0.1182	0.2044	0	0.2517	0	0.3023	0.4144	0	0.0397	0.3142	0	0.1856	0.0596	0.3863	0.042	0.5849	0.1314
0.125	0.0876	0	0.0997	0.6961	0.3344	0.5221	0.0733	0.6961	0	0.2438	0.0923	0.0343	0.1509	0.1149	0.2655	0.0896	0.1177	0.0293	0.2772	0.1359	0.4862	0.2881	0.0161	0.3184	0	0.1791	0.0943	0	0.6961	0.1029	0.0256	0.1109	0.3312	0.2179	0.6961	0.0654	0.6961	0.2286	0.0862	0.6961	0.0833	0.273	0	0.0762	0.0323	0.2465	0.5882	0.1654	0.2175
0.2009	0.1036	0	0.1083	0.5485	0.3879	0.0689	0.1457	0.0827	0	0.2684	0.1806	0.0671	0.2097	0.1275	0.5484	0.1479	0.1304	0.0663	0.6084	0.1956	0.4474	0.4611	0.039	0.489	0	0.355	0.1457	0	0.0827	0.1415	0.054	0.1609	0.7236	0.4113	0.0827	0.1154	0.0827	0.2631	0.1062	0.0827	0.1384	0.4189	0	0.156	0.0623	0.4954	0.1358	0.23	0.363
0.1548	0.2226	0.0136	0.1247	0.1711	0.3744	0.0155	0.4209	0.0071	0.0819	0.397	0.1576	0.0876	0.2852	0.0811	0.5151	0.1453	0.1294	0.2021	0.306	0.2122	0.2453	0.4988	0.1778	0.4551	0.0136	0.6451	0.1695	0.0136	0.0071	0.2888	0.306	0.2656	0.3287	0.6386	0.0071	0.31	0.0071	0.1872	0.1567	0.0071	0.0907	0.5688	0.0136	0.1666	0.1692	0.5575	0.1278	0.272	0.5237
0.1231	0.1006	0.2222	0.0818	0.1485	0.4849	0.0317	0.3391	0	0.0128	0.1964	0.2014	0.3205	0.1957	0.0922	0.4215	0.1557	0.095	0.1202	0.3626	0.2155	0.3658	0.375	0.2667	0.4651	0.2222	0.4539	0.103	0.2222	0	0.1806	0.1071	0.1684	0.4007	0.449	0	0.1506	0	0.1866	0.0904	0	0.4996	0.4402	0.2222	0.2273	0.1131	0.3599	0.0855	0.3581	0.4736
0.178	0.2805	0	0.3597	0.2155	0.6091	0	0.1529	0	0	0.1544	0.3538	0.1098	0.3141	0.1227	0.4364	0.2909	0.3609	0.0957	0.3133	0.2591	0.2474	0.4678	0.0764	0.7665	0	0.5254	0.15	0	0	0.5329	0.0888	0.26	0.1962	0.5499	0	0.1868	0	0.2688	0.1074	0	0.3353	0.5279	0	0.1922	0.0736	0.5031	0.3158	0.2791	0.3886
0	0	1	0	0	0	0	0.3333	0	0	0.0794	0	0.6667	0	0	0.0099	0	0	0	0.25	0	0.5	0	0.4109	0	1	0	0	1	0	0	0	0	0.3333	0	0	0.0272	0	0	0	0	0.6667	0.1429	1	0	0.0545	0	0	0	0.1538
0.3923	0.1248	0	0.1692	0.3877	0.6872	0.0196	0.2046	0.0221	0	0.259	0.192	0.114	0.2539	0.133	0.5992	0.3345	0.1367	0.1004	0.527	0.2624	0.3798	0.6205	0.0687	0.6537	0	0.5959	0.1468	0	0.0221	0.2207	0.0938	0.2053	0.5867	0.5743	0.0221	0.134	0.0221	0.2676	0.1182	0.0221	0.3164	0.5937	0	0.192	0.0765	0.626	0.1313	0.2542	0.4621
0.156	0.1066	0	0.1935	0.3341	0.4993	0.0196	0.1678	0.0221	0	0.2599	0.3313	0.1163	0.2076	0.1084	0.4181	0.4762	0.1117	0.1873	0.2647	0.222	0.3305	0.4661	0.097	0.4634	0	0.4523	0.0985	0	0.0221	0.1917	0.301	0.1717	0.2802	0.4696	0.0221	0.1351	0.0221	0.206	0.0964	0.0221	0.0923	0.4523	0	0.2297	0.1166	0.403	0.1091	0.1885	0.4088
0.1645	0.2886	0	0.2427	0.2489	0.5964	0.0279	0.2486	0.0118	0.1361	0.274	0.2143	0.0691	0.2479	0.0827	0.4946	0.2529	0.1945	0.0757	0.417	0.1997	0.2672	0.6609	0.1806	0.6642	0	0.6133	0.217	0	0.0118	0.446	0.0596	0.2701	0.4415	0.5901	0.0118	0.1332	0.0118	0.1923	0.2026	0.0118	0.2047	0.5932	0	0.1267	0.0482	0.6695	0.1878	0.3194	0.4452
0.1435	0.0829	0.2857	0.0773	0.3918	0.3552	0.0517	0.301	0.0591	0	0.2718	0.1405	0.3003	0.1631	0.091	0.4902	0.1183	0.0931	0.0515	0.6772	0.1565	0.5702	0.4254	0.2312	0.4347	0.2857	0.3969	0.1041	0.2857	0.0591	0.1209	0.042	0.1252	0.7839	0.454	0.0591	0.102	0.0591	0.1879	0.0797	0.0591	0.3743	0.4801	0.2857	0.1115	0.0523	0.4617	0.1018	0.3888	0.4417
0	0.0345	0	0	0.0588	0.0196	0.5	0	0.6667	0	0.2418	0	0	0.0414	0	0.1814	0	0	0	0.2418	0.0345	0.0353	0.0147	0	0.016	0	0.0127	0	0	0.6667	0	0.4	0	0.0252	0.0084	0.6667	0.0414	0.6667	0	0	0.6667	0	0.0118	0	0	0	0.0118	0.5	0	0.1634
0	0	1	0	0	0	0	0.3333	0	0	0.0794	0	0.6667	0	0	0.0099	0	0	0	0.25	0	0.5	0	0.4109	0	1	0	0	1	0	0	0	0	0.3333	0	0	0.0272	0	0	0	0	0.6667	0.1429	1	0	0.0545	0	0	0	0.1538
0.1818	0.0338	0	0.1983	0.1443	0.2991	0.5	0.0332	0.6667	0	0.0528	0.0338	0.0132	0.0875	0.0445	0.0951	0.3889	0.0455	0.0141	0.0717	0.0761	0.1343	0.2609	0.0217	0.1499	0	0.1643	0.0305	0	0.6667	0.0806	0.0099	0.0411	0.0778	0.1959	0.6667	0.0227	0.6667	0.137	0.0333	0.6667	0.0323	0.1802	0	0.0457	0.0157	0.1295	0.5341	0.0913	0.0774
0.0215	0.0121	0.6667	0.0101	0.0411	0.0905	0	0.3219	0	0	0.0945	0.0799	0.5429	0.1864	0.0159	0.1027	0.0491	0.0163	0.0456	0.2584	0.0516	0.4422	0.1239	0.3581	0.1037	0.6667	0.0811	0.1621	0.6667	0	0.1221	0.032	0.2248	0.3288	0.0972	0	0.1215	0	0.0497	0.0119	0	0.5115	0.2285	0.6667	0.1493	0.0678	0.1306	0.0122	0.1122	0.2148
0	0.4	0	0	0	0	0	0	0	0	0.0259	0	0	0.5	0	0.0188	0	0	0	0.0259	0.4	0	0	0	0	0	0.004	0	0	0	0	0.0517	0	0	0	0	0.5	0	0	0	0	0	0	0	0	0	0	0	0	0.0198
0.125	0.0876	0	0.0997	0.6961	0.3344	0.5221	0.0733	0.6961	0	0.2438	0.0923	0.0343	0.1509	0.1149	0.2655	0.0896	0.1177	0.0293	0.2772	0.1359	0.4862	0.2881	0.0161	0.3184	0	0.1791	0.0943	0	0.6961	0.1029	0.0256	0.1109	0.3312	0.2179	0.6961	0.0654	0.6961	0.2286	0.0862	0.6961	0.0833	0.273	0	0.0762	0.0323	0.2465	0.5882	0.1654	0.2175
0.0739	0.2729	0	0.0532	0.1335	0.4643	0.2222	0.2813	0.25	0	0.2284	0.2434	0.0729	0.2449	0.1336	0.3202	0.1339	0.2818	0.3134	0.2468	0.2637	0.2785	0.3437	0.0897	0.2627	0	0.3907	0.0573	0	0.25	0.2662	0.0877	0.1428	0.136	0.4336	0.25	0.1368	0.25	0.2942	0.1188	0.25	0.0685	0.3527	0	0.2145	0.1234	0.3074	0.4727	0.3062	0.3904
0	0	0	0	0.0882	0.0221	0.6667	0	1	0	0.0221	0	0	0	0	0.016	0	0	0	0.0221	0	0.0441	0.016	0	0.0176	0	0.0071	0	0	1	0	0	0	0.0294	0.0088	1	0	1	0	0	1	0	0.0126	0	0	0	0.0126	0.6667	0	0.0162
0.1574	0.2784	0	0.0421	0.1669	0.328	0.1485	0.3768	0.0974	0.1012	0.2923	0.1154	0.033	0.2451	0.0476	0.3499	0.0663	0.1143	0.0953	0.3181	0.1995	0.197	0.3527	0.1743	0.4301	0	0.5168	0.141	0	0.0974	0.2376	0.1347	0.1771	0.3203	0.4435	0.0974	0.1888	0.0974	0.1239	0.1428	0.0974	0.1201	0.4307	0	0.0932	0.06	0.497	0.1996	0.1988	0.4744
0	0.4	0	0	0	0	0	0	0	0	0.0259	0	0	0.5	0	0.0188	0	0	0	0.0259	0.4	0	0	0	0	0	0.004	0	0	0	0	0.0517	0	0	0	0	0.5	0	0	0	0	0	0	0	0	0	0	0	0	0.0198
0.1789	0.2981	0	0.1432	0.3643	0.6678	0.0196	0.1721	0.0221	0	0.2603	0.1828	0.11	0.4319	0.1216	0.5941	0.3097	0.1251	0.0962	0.5197	0.4242	0.3579	0.5967	0.0605	0.6291	0	0.5439	0.1207	0	0.0221	0.1975	0.1112	0.1844	0.5623	0.5629	0.0221	0.3271	0.0221	0.2402	0.1081	0.0221	0.3066	0.5044	0	0.1828	0.0728	0.5374	0.121	0.2322	0.4602
0.0928	0.4136	0	0.0435	0.1765	0.3274	0	0.0396	0	0	0.0495	0.5084	0.018	0.1124	0.0682	0.2477	0.04	1	0.0181	0.2863	0.0939	0.1498	0.1059	0.0096	0.1195	0	0.1353	0.0466	0	0	0.356	0.0126	0.0525	0.0778	0.1705	0	0.029	0	0.2113	0.0455	0	0.0439	0.2297	0	0.0704	0.024	0.0911	0.6667	0.1173	0.2025
0.1743	0.286	0	0.1533	0.3673	0.553	0.0196	0.257	0.0221	0	0.4433	0.1766	0.1216	0.3491	0.3292	0.6021	0.3132	0.1259	0.2189	0.423	0.2959	0.3912	0.5098	0.1358	0.5352	0	0.526	0.1572	0	0.0221	0.3417	0.3964	0.425	0.2952	0.6109	0.0221	0.2206	0.0221	0.2818	0.2926	0.0221	0.1043	0.4923	0	0.2064	0.1539	0.4676	0.1217	0.2749	0.5332
0	0	0	0	0.0882	0.0221	0.6667	0	1	0	0.0221	0	0	0	0	0.016	0	0	0	0.0221	0	0.0441	0.016	0	0.0176	0	0.0071	0	0	1	0	0	0	0.0294	0.0088	1	0	1	0	0	1	0	0.0126	0	0	0	0.0126	0.6667	0	0.0162
0.3137	0.3638	0	0.259	0.1825	0.4531	0.021	0.4005	0	0.1571	0.2483	0.2642	0.0938	0.2982	0.1436	0.5669	0.2737	0.2364	0.1248	0.4406	0.3013	0.2925	0.5627	0.1166	0.5312	0	0.5898	0.1248	0	0	0.3092	0.1584	0.2059	0.4964	0.6442	0	0.1229	0	0.311	0.2762	0	0.1066	0.8367	0	0.1678	0.0855	0.5944	0.2195	0.2928	0.471
0	0	0	0	0.0882	0.0221	0.6667	0	1	0	0.0221	0	0	0	0	0.016	0	0	0	0.0221	0	0.0441	0.016	0	0.0176	0	0.0071	0	0	1	0	0	0	0.0294	0.0088	1	0	1	0	0	1	0	0.0126	0	0	0	0.0126	0.6667	0	0.0162
0.0147	0.0102	0.5136	0.009	0.0562	0.0681	0.4	0.3601	0.5	0	0.3031	0.0336	0.4318	0.0356	0.0118	0.2297	0.0231	0.012	0.1148	0.2414	0.04	0.3809	0.0635	0.5157	0.067	0.5136	0.1225	0.0277	0.5136	0.5	0.0372	0.1064	0.0397	0.2988	0.1428	0.5	0.3515	0.5	0.0272	0.0094	0.5	0.4155	0.2073	0.5136	0.0818	0.4161	0.0611	0.4096	0.0276	0.247
0.3243	0.2193	0.2222	0.2799	0.3158	0.5153	0.0176	0.2748	0.0196	0	0.2357	0.2334	0.2271	0.1588	0.0766	0.4252	0.226	0.2732	0.0294	0.7161	0.1507	0.4851	0.4767	0.2356	0.5876	0.2222	0.4715	0.0953	0.2222	0.0196	0.3028	0.0232	0.1083	0.5321	0.4344	0.0196	0.0823	0.0196	0.1865	0.069	0.0196	0.4593	0.6026	0.2222	0.0622	0.0309	0.5244	0.2547	0.1865	0.483
0.1414	0.2963	0	0.0669	0.3831	0.3427	0.0512	0.3201	0.0294	0.3333	0.3368	0.1525	0.0613	0.3735	0.0805	0.5063	0.1267	0.0824	0.0804	0.5244	0.1443	0.3368	0.5163	0.0797	0.4868	0	0.3625	0.2502	0	0.0294	0.2429	0.0502	0.3995	0.8117	0.4121	0.0294	0.1972	0.0294	0.1729	0.3547	0.0294	0.0979	0.4193	0	0.1546	0.057	0.5802	0.0832	0.2705	0.3407
0	0	0	0	0	0.0883	0	0	0	0	0	0	0	0	0	0.0202	0	0	0	0.0278	0	0	0.0645	0	0.0529	0	0.1018	0	0	0	0.0186	0	0	0.037	0.1056	0	0.0279	0	0	0	0	0.1091	0	0	0	0	0.0507	0	0.5	0.025
0.033	0.3333	0	0.0111	0	0.0072	0	0	0	0	0.023	0	0	0.4	0	0.0172	0.0142	0	0	0.2452	0.3333	0	0.0068	0.0909	0.018	0	0.0154	0	0	0	0.0909	0.0414	0	0	0.0119	0	0.4	0	0	0	0	0	0.0227	0	0	0	0.0644	0	0	0.0357
0.1565	0.2652	0.2857	0.0834	0.4164	0.3497	0.0517	0.3211	0.0591	0	0.2851	0.148	0.3036	0.2305	0.3515	0.5007	0.125	0.1029	0.0555	0.6819	0.2171	0.6375	0.4209	0.2335	0.4424	0.2857	0.3406	0.1106	0.2857	0.0591	0.122	0.0448	0.3278	0.7895	0.4027	0.0591	0.1008	0.0591	0.2745	0.3076	0.0591	0.3619	0.512	0.2857	0.1212	0.0557	0.458	0.1104	0.2463	0.4493
0.0736	0.3492	0	0.0346	0.1405	0.4623	0	0.0849	0	0	0.0826	0.4357	0.5068	0.1232	0.0542	0.286	0.0506	0.6757	0.0579	0.2767	0.5278	0.1368	0.1388	0.0305	0.2947	0	0.2635	0.0511	0	0	0.5879	0.0409	0.0767	0.0953	0.2686	0	0.0515	0	0.1691	0.0407	0	0.0393	0.2576	0	0.4189	0.0611	0.1239	0.5068	0.1121	0.2491
0.1468	0.1108	0.25	0.1029	0.3479	0.4633	0.0196	0.3366	0.0221	0	0.2784	0.1905	0.3431	0.4095	0.1141	0.5881	0.1591	0.1175	0.1098	0.6371	0.2294	0.5423	0.6495	0.2428	0.5829	0.25	0.463	0.2553	0.25	0.0221	0.3839	0.0995	0.4204	0.7193	0.5267	0.0221	0.3414	0.0221	0.2208	0.1014	0.0221	0.3512	0.612	0.25	0.2182	0.0906	0.6833	0.1142	0.3034	0.5528
0	0.5714	0.5	0	0	0	0.0364	0.5	0	0.5	0.2363	0	0.4	0.3333	0	0.0352	0	0	0.0212	0.2207	0.2857	0.3333	0.0064	0.3471	0	0.5	0.0068	0	0.5	0	0	0.0345	0	0.5	0	0	0.3515	0	0	0.4	0	0.4	0.1304	0.5	0	0.0272	0	0	0	0.156
0	0	1	0	0	0	0	0.3333	0	0	0.0794	0	0.6667	0	0	0.0099	0	0	0	0.25	0	0.5	0	0.4109	0	1	0	0	1	0	0	0	0	0.3333	0	0	0.0272	0	0	0	0	0.6667	0.1429	1	0	0.0545	0	0	0	0.1538
0	0	0	0	0.0882	0.0221	0.6667	0	1	0	0.0221	0	0	0	0	0.016	0	0	0	0.0221	0	0.0441	0.016	0	0.0176	0	0.0071	0	0	1	0	0	0	0.0294	0.0088	1	0	1	0	0	1	0	0.0126	0	0	0	0.0126	0.6667	0	0.0162
0.1448	0.0759	0	0.0853	0.443	0.3306	0.0294	0.0892	0.0353	0	0.2336	0.0876	0.1286	0.2694	0.0849	0.2774	0.0998	0.0869	0.0616	0.2514	0.2161	0.3711	0.3256	0.0806	0.4483	0	0.3598	0.1656	0	0.0353	0.3849	0.2844	0.267	0.2776	0.3449	0.0353	0.1554	0.0353	0.1881	0.0708	0.0353	0.0684	0.3146	0	0.2459	0.0824	0.389	0.0871	0.201	0.2289
0	0	0	0	0.0882	0.0221	0.6667	0	1	0	0.0221	0	0	0	0	0.016	0	0	0	0.0221	0	0.0441	0.016	0	0.0176	0	0.0071	0	0	1	0	0	0	0.0294	0.0088	1	0	1	0	0	1	0	0.0126	0	0	0	0.0126	0.6667	0	0.0162
0.1434	0.2599	0.25	0.1361	0.3529	0.7864	0.0196	0.3239	0.0221	0	0.2879	0.3276	0.5808	0.2203	0.1138	0.5062	0.2921	0.3225	0.1019	0.519	0.5153	0.5486	0.5044	0.2447	0.5558	0.25	0.503	0.0996	0.25	0.0221	0.5003	0.0924	0.1716	0.4508	0.5428	0.0221	0.1079	0.0221	0.2286	0.1012	0.0221	0.3192	0.6087	0.25	0.3029	0.083	0.387	0.2965	0.2066	0.5505
0.0882	0.0393	0	0.0411	0.1667	0.3371	0	0.0375	0	0	0.0468	0.0409	0.0169	0.105	0.0645	0.1059	0.0379	0.0659	0.017	0.0908	0.0878	0.1404	0.1354	0.0092	0.3131	0	0.1495	0.0443	0	0	0.0835	0.0119	0.0496	0.11	0.0986	0	0.0932	0	0.1974	0.043	0	0.6667	0.1051	0	0.0658	0.0231	0.1139	0.0439	0.1507	0.0909
0	0	1	0	0	0	0	0.3333	0	0	0.0794	0	0.6667	0	0	0.0099	0	0	0	0.25	0	0.5	0	0.4109	0	1	0	0	1	0	0	0	0	0.3333	0	0	0.0272	0	0	0	0	0.6667	0.1429	1	0	0.0545	0	0	0	0.1538
0.2858	0.2357	0.1333	0.2261	0.1676	0.4213	0.0689	0.3895	0	0.0279	0.1998	0.2374	0.2104	0.3066	0.1275	0.535	0.2473	0.208	0.1243	0.5026	0.277	0.3855	0.537	0.3081	0.4992	0.1333	0.5843	0.2257	0.1333	0	0.2976	0.1428	0.2964	0.4736	0.6151	0	0.1337	0	0.2806	0.143	0	0.221	0.916	0.1333	0.1565	0.0815	0.6189	0.195	0.362	0.5455
0.2014	0.1623	0.0103	0.075	0.1947	0.3931	0.0483	0.3645	0.0098	0.1186	0.283	0.0866	0.0611	0.2182	0.0639	0.4072	0.1843	0.0553	0.1136	0.2764	0.1609	0.2404	0.429	0.1267	0.4609	0.0103	0.5383	0.1819	0.0103	0.0098	0.2078	0.2255	0.2277	0.3803	0.4821	0.0098	0.146	0.0098	0.1648	0.1694	0.0098	0.1526	0.5903	0.0103	0.1406	0.0956	0.5277	0.0571	0.2552	0.3456
0.1311	0.2494	0.1034	0.1204	0.1551	0.3774	0.0252	0.2849	0.0099	0.0515	0.296	0.2041	0.1466	0.2608	0.1075	0.4364	0.2228	0.1075	0.0992	0.3542	0.2182	0.3126	0.4504	0.1761	0.4491	0.1034	0.5548	0.0804	0.1034	0.0099	0.2174	0.1298	0.1897	0.3496	0.537	0.0099	0.163	0.0099	0.1669	0.1526	0.0099	0.1974	0.5365	0.1034	0.0958	0.0664	0.4329	0.1114	0.1848	0.4308
0.0383	0	0.6667	0	0	0.0361	0	0.3028	0	0	0.0706	0	0.5	0	0	0.0314	0	0	0	0.252	0	0.4	0.0687	0.3424	0.06	0.6667	0.0241	0.0192	0.6667	0	0.0691	0	0.0115	0.324	0.017	0	0.1185	0	0	0	0	0.5507	0.1464	0.6667	0	0.0363	0.0583	0	0.041	0.166
0.0422	0.1282	0.0218	0.0206	0.0963	0.1152	0.3333	0.1497	0.4	0	0.2555	0.0449	0.04	0.1597	0.1914	0.2521	0.2873	0.0321	0.2026	0.0747	0.148	0.1898	0.1139	0.211	0.1242	0.0218	0.1451	0.0313	0.0218	0.4	0.0458	0.0947	0.164	0.0838	0.1921	0.4	0.3	0.4	0.2027	0.1595	0.4	0.0397	0.1632	0.0218	0.0791	0.3267	0.1039	0.3601	0.1528	0.1446
0.1455	0.1311	0.4	0.1414	0.4795	0.4961	0.0294	0.3881	0.0353	0	0.3167	0.4528	0.4754	0.2506	0.1493	0.5449	0.3705	0.154	0.1151	0.4866	0.253	0.7103	0.4365	0.3095	0.4753	0.4	0.394	0.1377	0.4	0.0353	0.1943	0.1106	0.2218	0.5628	0.461	0.0353	0.1305	0.0353	0.263	0.1244	0.0353	0.4524	0.545	0.4	0.2424	0.106	0.3912	0.143	0.2231	0.5023
0	0.2857	0.1216	0	0.0441	0.0176	0.4	0.0608	0.5	0	0.0714	0	0.0973	0.3333	0	0.0343	0	0	0	0.087	0.2857	0.1105	0.0136	0.0739	0.0147	0.1216	0.0102	0	0.1216	0.5	0	0.0345	0	0.0829	0.008	0.5	0.3437	0.5	0	0	0.5	0.0973	0.0414	0.1216	0	0.0156	0.011	0.4	0	0.0636
0.0782	0.3818	0.2804	0.0199	0.0888	0.2622	0	0.4329	0	0	0.276	0.0444	0.2955	0.4327	0.2661	0.1748	0.0386	0.0335	0.0738	0.2636	0.3396	0.3807	0.1911	0.2631	0.2896	0.2804	0.2625	0.2654	0.2804	0	0.1317	0.0728	0.4681	0.2846	0.2486	0	0.3462	0	0.174	0.2365	0	0.4855	0.3642	0.2804	0.1596	0.092	0.2626	0.0298	0.339	0.363
0.2547	0.2591	0.1053	0.1919	0.2446	0.4563	0.119	0.3565	0.1099	0.0067	0.2572	0.2129	0.1826	0.3013	0.1946	0.6027	0.2218	0.182	0.1729	0.5126	0.2773	0.43	0.5847	0.1927	0.5209	0.1053	0.6088	0.2024	0.1053	0.1099	0.2677	0.1457	0.3359	0.4751	0.6636	0.1099	0.143	0.1099	0.2782	0.187	0.1099	0.1928	0.9042	0.1053	0.1558	0.094	0.6224	0.2729	0.3457	0.5415
0.0928	0.4136	0	0.0435	0.1765	0.3274	0	0.0396	0	0	0.0495	0.5084	0.018	0.1124	0.0682	0.2477	0.04	1	0.0181	0.2863	0.0939	0.1498	0.1059	0.0096	0.1195	0	0.1353	0.0466	0	0	0.356	0.0126	0.0525	0.0778	0.1705	0	0.029	0	0.2113	0.0455	0	0.0439	0.2297	0	0.0704	0.024	0.0911	0.6667	0.1173	0.2025
0	0	0	0	0.0882	0.0221	0.6667	0	1	0	0.0221	0	0	0	0	0.016	0	0	0	0.0221	0	0.0441	0.016	0	0.0176	0	0.0071	0	0	1	0	0	0	0.0294	0.0088	1	0	1	0	0	1	0	0.0126	0	0	0	0.0126	0.6667	0	0.0162
0.1626	0.0799	0.4	0.0769	0.4461	0.3395	0.0294	0.3457	0.0353	0	0.2747	0.1542	0.3887	0.1579	0.0913	0.5142	0.1249	0.0934	0.0556	0.7433	0.1502	0.6585	0.4231	0.2828	0.4481	0.4	0.3354	0.1168	0.4	0.0353	0.1206	0.0446	0.1351	0.8889	0.387	0.0353	0.1029	0.0353	0.1905	0.0761	0.0353	0.4434	0.5042	0.4	0.1325	0.0634	0.4642	0.0925	0.1782	0.455
0.0543	0.585	0	0.0255	0.1033	0.25	0.0364	0.3554	0	0.5	0.2257	0.0525	0.4053	0.1921	0.5066	0.142	0.0428	0.0408	0.0694	0.0726	0.529	0.2027	0.1395	0.0797	0.2789	0	0.1968	0.0381	0	0	0.2813	0.034	0.3745	0.3322	0.2019	0	0.0428	0	0.2609	0.8053	0	0.0309	0.1693	0	0.3137	0.0457	0.1228	0.0327	0.1828	0.1308
0.1026	0.0789	0.5	0.079	0.5171	0.3311	0.0353	0.3297	0.0441	0	0.2806	0.1283	0.4524	0.4476	0.0928	0.2887	0.1095	0.095	0.0545	0.4572	0.1359	0.7379	0.4015	0.3154	0.3693	0.5	0.2222	0.3105	0.5	0.0441	0.2654	0.0406	0.4825	0.5495	0.2678	0.0441	0.2258	0.0441	0.1926	0.0742	0.0441	0.4717	0.4428	0.5	0.1557	0.0655	0.3949	0.0936	0.2977	0.358
0	0	1	0	0	0	0	0.3333	0	0	0.0794	0	0.6667	0	0	0.0099	0	0	0	0.25	0	0.5	0	0.4109	0	1	0	0	1	0	0	0	0	0.3333	0	0	0.0272	0	0	0	0	0.6667	0.1429	1	0	0.0545	0	0	0	0.1538
0.1283	0.2239	0.1538	0.0906	0.2395	0.5211	0.0534	0.3589	0.0136	0.0103	0.4293	0.1291	0.2285	0.3521	0.0798	0.5875	0.2198	0.082	0.0936	0.6065	0.3213	0.3876	0.5	0.2436	0.5135	0.1538	0.5775	0.2124	0.1538	0.0136	0.1766	0.2238	0.2574	0.5386	0.5322	0.0136	0.2813	0.0136	0.1659	0.0836	0.0136	0.3444	0.5706	0.1538	0.1654	0.0814	0.5196	0.0825	0.277	0.6958
0	0	1	0	0	0	0	0.3333	0	0	0.0794	0	0.6667	0	0	0.0099	0	0	0	0.25	0	0.5	0	0.4109	0	1	0	0	1	0	0	0	0	0.3333	0	0	0.0272	0	0	0	0	0.6667	0.1429	1	0	0.0545	0	0	0	0.1538
0.2565	0.3175	0.0374	0.0958	0.2512	0.5236	0.0256	0.296	0.0136	0.1538	0.2953	0.2428	0.1124	0.221	0.0867	0.5441	0.1384	0.2154	0.0813	0.6204	0.1925	0.2985	0.4417	0.2459	0.5909	0.0374	0.5687	0.1225	0.0374	0.0136	0.483	0.0664	0.1943	0.57	0.5419	0.0136	0.1189	0.0136	0.1796	0.2234	0.0136	0.2425	0.5759	0.0374	0.1318	0.0541	0.619	0.2063	0.1976	0.4676
0	0	0.6667	0	0	0.0785	0	0.2857	0	0	0.0706	0	0.5	0	0	0.0276	0	0	0	0.2469	0	0.4	0.0591	0.3424	0.0481	0.6667	0.0979	0	0.6667	0	0.016	0	0	0.3175	0.1005	0	0.0442	0	0	0	0	0.5818	0.1333	0.6667	0	0.0363	0.0473	0	0.4	0.1661
0.4687	0.2829	0	0.4557	0.1549	0.3537	0	0.2337	0	0	0.1531	0.3442	0.0554	0.1547	0.0656	0.4309	0.3113	0.4345	0.3008	0.2955	0.1485	0.1578	0.344	0.1112	0.3586	0	0.4637	0.1137	0	0	0.3368	0.15	0.1248	0.1531	0.4886	0	0.1293	0	0.1835	0.0546	0	0.0529	0.5244	0	0.1465	0.152	0.3879	0.3621	0.161	0.3186
0.1714	0.1425	0.6667	0.1829	0.2299	0.3916	0	0.463	0	0	0.1965	0.2437	0.6808	0.2541	0.1858	0.3542	0.1781	0.1921	0.1286	0.3866	0.2697	0.6508	0.3482	0.3946	0.386	0.6667	0.2944	0.1583	0.6667	0	0.2134	0.1308	0.2479	0.456	0.3441	0	0.1406	0	0.303	0.1394	0	0.6328	0.4889	0.6667	0.303	0.1406	0.3145	0.1441	0.2293	0.436
0.0789	0.1533	0.1869	0.0602	0.0737	0.4175	0.1674	0.3418	0.1667	0.0069	0.148	0.1752	0.1987	0.0788	0.0268	0.2907	0.3119	0.1825	0.1512	0.3126	0.074	0.2465	0.3988	0.2319	0.1691	0.1869	0.4219	0.0469	0.1869	0.1667	0.1863	0.3113	0.0624	0.2365	0.3802	0.1667	0.1006	0.1667	0.0786	0.028	0.1667	0.2092	0.4431	0.1869	0.0704	0.0924	0.2414	0.3223	0.122	0.386
0.0606	0.4072	0	0.0283	0.1149	0.1054	0.25	0.1229	0	0.125	0.0738	0.0338	0.0132	0.1971	0.6667	0.1063	0.0326	0.0455	0.0717	0.0583	0.1675	0.2263	0.1162	0.3412	0.1172	0	0.0964	0.0305	0	0	0.0385	0.0099	0.4144	0.1188	0.1045	0	0.0227	0	0.3197	0.5938	0	0.0323	0.141	0	0.0457	0.0157	0.0912	0.0341	0.2009	0.1266
0	0	1	0	0	0	0	0.3333	0	0	0.0794	0	0.6667	0	0	0.0099	0	0	0	0.25	0	0.5	0	0.4109	0	1	0	0	1	0	0	0	0	0.3333	0	0	0.0272	0	0	0	0	0.6667	0.1429	1	0	0.0545	0	0	0	0.1538
0	0.4	0	0	0	0	0.0606	0.3333	0	1	0.1902	0	0	0	0	0.0128	0	0	0.0319	0	0	0	0.0075	0.075	0	0	0.0053	0	0	0	0	0	0	0.3333	0	0	0	0	0	0.6667	0	0	0.0061	0	0	0	0	0	0	0.0103
0.0611	0.3033	0.5	0.0342	0.1105	0.3105	0	0.5097	0	0	0.2291	0.4099	0.4814	0.1337	0.0475	0.3934	0.0682	0.5137	0.2787	0.464	0.1389	0.4507	0.1399	0.4166	0.1479	0.5	0.3154	0.0781	0.5	0	0.3314	0.2487	0.1082	0.352	0.3785	0	0.1873	0	0.132	0.038	0	0.4368	0.433	0.5	0.1755	0.2427	0.1357	0.411	0.1148	0.4772
0.1477	0.0766	0.3333	0.0682	0.3967	0.3354	0.0252	0.3188	0.0294	0	0.2643	0.1411	0.3359	0.1603	0.0842	0.501	0.1164	0.0861	0.0522	0.7077	0.1533	0.5984	0.4181	0.2535	0.4387	0.3333	0.3358	0.1023	0.3333	0.0294	0.1202	0.0413	0.1243	0.8316	0.384	0.0294	0.1046	0.0294	0.1883	0.0722	0.0294	0.4068	0.4905	0.3333	0.1203	0.056	0.4578	0.0864	0.1781	0.4468
0.0688	0.0274	0	0.0229	0.1392	0.1241	0	0.0375	0	0	0.0457	0.0618	0.0349	0.311	0.045	0.1039	0.0429	0.0459	0.0394	0.0748	0.0825	0.1162	0.2947	0.0219	0.1884	0	0.0993	0.3041	0	0	0.4034	0.0248	0.3576	0.0921	0.113	0	0.5137	0	0.1627	0.03	0	0.1165	0.119	0	0.1627	0.0547	0.2751	0.0306	0.2067	0.078
0.0819	0.1598	0.196	0.0397	0.1525	0.3263	0.0084	0.2719	0.0088	0.0158	0.359	0.1484	0.2132	0.2063	0.071	0.3753	0.1092	0.1306	0.1285	0.5692	0.1488	0.3978	0.3508	0.2217	0.3385	0.196	0.3756	0.147	0.196	0.0088	0.2531	0.0238	0.2106	0.4705	0.4033	0.0088	0.1082	0.0088	0.1587	0.0826	0.0088	0.2411	0.5235	0.196	0.0608	0.0548	0.4937	0.1286	0.2587	0.403
0.3274	0.2262	0.25	0.0945	0.3132	0.3958	0.0196	0.277	0.0221	0	0.2644	0.2474	0.2503	0.2217	0.0687	0.334	0.1204	0.2895	0.0312	0.6356	0.1284	0.4939	0.3265	0.2617	0.3175	0.25	0.3027	0.2997	0.25	0.0221	0.3402	0.0237	0.3173	0.4184	0.2994	0.0221	0.0972	0.0221	0.1603	0.0611	0.0221	0.2813	0.6128	0.25	0.0736	0.0334	0.4733	0.2671	0.3117	0.4027
0.0445	0.468	0.3333	0.0244	0.0588	0.2238	0	0.2238	0	0	0.265	0.2542	0.2934	0.3242	0.0227	0.3321	0.0302	0.3333	0.009	0.5603	0.2904	0.3249	0.0827	0.285	0.1082	0.3333	0.1349	0.0155	0.3333	0	0.2747	0.2779	0.0262	0.2467	0.1556	0	0.2931	0	0.0704	0.0195	0	0.3045	0.2985	0.3333	0.0235	0.0222	0.0978	0.2857	0.0587	0.4048
0.0344	0.3053	0.5	0.0115	0.0696	0.0993	0.0364	0.5281	0	0.5	0.2468	0.0412	0.4209	0.2074	0.0225	0.0995	0.0307	0.023	0.0475	0.2598	0.0589	0.4108	0.2526	0.3549	0.157	0.5	0.0969	0.152	0.5	0	0.3026	0.0165	0.2384	0.569	0.1027	0	0.3515	0	0.0814	0.418	0	0.4699	0.2318	0.5	0.0814	0.041	0.2407	0.0184	0.1378	0.2098
0.1698	0.3525	0	0.0361	0.1621	0.1335	0	0.1062	0	0	0.0639	0.0682	0.0332	0.4119	0.6819	0.1308	0.0538	0.061	0.0391	0.0951	0.2022	0.2594	0.2059	0.0224	0.183	0	0.1106	0.6819	0	0	0.164	0.0251	0.9101	0.1125	0.1537	0	0.1417	0	0.3749	0.5114	0	0.0433	0.2856	0	0.1332	0.0448	0.2972	0.0457	0.5918	0.0989
0.0495	0	0	0.0166	0	0.0081	0	0	0	0	0	0	0	0	0	0	0.017	0	0	0.25	0	0	0.0074	0.1091	0.0198	0	0.012	0	0	0	0.106	0	0	0	0.0125	0	0	0	0	0	0	0	0.0244	0	0	0	0.069	0	0	0.0187
0.1013	0.1828	0.0061	0.0539	0.1844	0.3751	0.0246	0.4025	0.0098	0.0071	0.3782	0.0935	0.1218	0.3005	0.0872	0.4156	0.0933	0.0582	0.209	0.2599	0.353	0.2606	0.3831	0.268	0.4146	0.0061	0.4972	0.0814	0.0061	0.0098	0.2337	0.2395	0.144	0.2124	0.5235	0.0098	0.3215	0.0098	0.1945	0.0849	0.0098	0.1529	0.4539	0.0061	0.2498	0.2218	0.376	0.0598	0.2006	0.4298
0.1875	0.1051	0	0.1496	1	0.3652	0.0588	0.0855	0.0882	0	0.2632	0.1154	0.0457	0.1886	0.1724	0.2817	0.1075	0.1765	0.0366	0.3009	0.1631	0.5857	0.3062	0.0194	0.3414	0	0.1827	0.1414	0	0.0882	0.12	0.0321	0.1387	0.3717	0.2244	0.0882	0.0817	0.0882	0.3429	0.1149	0.0882	0.1111	0.2862	0	0.1143	0.0484	0.2578	0.1471	0.2068	0.2249
0.151	0.353	0	0.0713	0.4011	0.4632	0.1145	0.1922	0.0294	0.119	0.265	0.3628	0.0513	0.1646	0.0875	0.6257	0.1186	0.3818	0.1311	0.6667	0.157	0.3526	0.428	0.1652	0.4367	0	0.4055	0.1051	0	0.0294	0.2909	0.0422	0.1268	0.6891	0.4468	0.0294	0.0889	0.0294	0.194	0.177	0.0294	0.1037	0.4777	0	0.1222	0.0477	0.4544	0.3398	0.1823	0.4499
0.1313	0.0235	0	0.0632	0.0638	0.1023	0	0.0303	0	0	0.038	0.041	0.0201	0.1886	0.0248	0.0833	0.0864	0.0253	0.0249	0.2732	0.0596	0.0764	0.157	0.2409	0.2451	0	0.1595	0.1308	0	0	0.463	0.0162	0.2174	0.0528	0.186	0	0.1006	0	0.075	0.0206	0	0.02	0.1737	0	0.07	0.0239	0.3171	0.0211	0.1202	0.0769
0	0.048	0	0	0	0	0.1629	0.0244	0	0.0732	0.0341	0	0	0.0416	0	0.0689	0	0	0.0186	0.0286	0.0333	0	0.0274	0.0606	0	0	0.0557	0	0	0	0	0.0571	0	0.0244	0	0	0.0416	0	0	0.0488	0	0	0.0234	0	0	0	0	0	0	0.1158
0	0	1	0	0	0	0	0.3333	0	0	0.0794	0	0.6667	0	0	0.0099	0	0	0	0.25	0	0.5	0	0.4109	0	1	0	0	1	0	0	0	0	0.3333	0	0	0.0272	0	0	0	0	0.6667	0.1429	1	0	0.0545	0	0	0	0.1538
0.1363	0.3147	0.5	0.1487	0.0862	0.2603	0.0364	0.5291	0	0.5	0.252	0.0282	0.4105	0.0729	0.0333	0.0933	0.3334	0.0341	0.033	0.2558	0.0653	0.4306	0.2372	0.3623	0.13	0.5	0.1599	0.0228	0.5	0	0.0705	0.0082	0.0342	0.5571	0.183	0	0.0332	0	0.1027	0.4267	0	0.4258	0.2911	0.5	0.0343	0.0331	0.1159	0.0273	0.0761	0.2064
0	0	0.6667	0	0.0588	0.0196	0.5	0.2857	0.6667	0	0.0902	0	0.5	0	0	0.0238	0	0	0	0.2418	0	0.4353	0.0147	0.3424	0.016	0.6667	0.0068	0	0.6667	0.6667	0	0	0	0.3109	0.0084	0.6667	0.0218	0.6667	0	0	0.6667	0.5	0.1451	0.6667	0	0.0363	0.0118	0.5	0	0.1579
0.1201	0.274	0	0.2353	0.2191	0.4386	0.0298	0.1902	0.0126	0.1458	0.2495	0.1714	0.024	0.1801	0.0511	0.3279	0.2368	0.1775	0.0411	0.3208	0.1221	0.2252	0.5363	0.1677	0.4545	0	0.3972	0.1791	0	0.0126	0.3476	0.0212	0.2099	0.3329	0.3935	0.0126	0.1013	0.0126	0.139	0.181	0.0126	0.0813	0.4942	0	0.0658	0.0236	0.4976	0.1716	0.272	0.2786
0.2426	0.0943	0	0.0539	0.1533	0.289	0	0.343	0	0	0.0869	0.0745	0.5092	0.2541	0.1562	0.1749	0.0637	0.0735	0.0596	0.1257	0.6368	0.2715	0.3143	0.0316	0.4731	0	0.2284	0.1627	0	0	0.3362	0.0428	0.1706	0.1478	0.2367	0	0.0604	0	0.3872	0.1171	0	0.0522	0.236	0	0.4211	0.0632	0.2804	0.0551	0.2758	0.152
0	0.068	0.0513	0	0	0.0625	0	0.029	0	0	0.0408	0.0816	0.0384	0	0	0.0507	0	0.1361	0.0084	0.0656	0	0.0308	0.0146	0.0419	0.0122	0.0513	0.0281	0	0.0513	0	0.0661	0.0066	0	0.026	0.0291	0	0.0401	0	0	0	0	0.0473	0.0384	0.0513	0	0.0577	0.0117	0.1021	0.014	0.0479
0	0	1	0	0	0	0	0.3333	0	0	0.0794	0	0.6667	0	0	0.0099	0	0	0	0.25	0	0.5	0	0.4109	0	1	0	0	1	0	0	0	0	0.3333	0	0	0.0272	0	0	0	0	0.6667	0.1429	1	0	0.0545	0	0	0	0.1538
0.1212	0.3186	0	0.0573	0.3284	0.3164	0.0736	0.3382	0.0252	0.3599	0.3633	0.1356	0.0536	0.332	0.069	0.4769	0.114	0.0706	0.0747	0.4841	0.1299	0.2994	0.4851	0.1211	0.4543	0	0.3552	0.2144	0	0.0252	0.2209	0.0447	0.3551	0.7851	0.3956	0.0252	0.1753	0.0252	0.1482	0.3753	0.0252	0.0857	0.3983	0	0.1325	0.0489	0.5497	0.0728	0.2405	0.3297
0	0	1	0	0	0	0	0.3333	0	0	0.0794	0	0.6667	0	0	0.0099	0	0	0	0.25	0	0.5	0	0.4109	0	1	0	0	1	0	0	0	0	0.3333	0	0	0.0272	0	0	0	0	0.6667	0.1429	1	0	0.0545	0	0	0	0.1538
0.2708	0.3097	0.125	0.2179	0.1638	0.4067	0.135	0.4448	0.125	0.1277	0.2521	0.2246	0.1984	0.2913	0.1206	0.5146	0.2402	0.196	0.1088	0.4827	0.2636	0.3702	0.5186	0.2112	0.5305	0.125	0.5848	0.1274	0.125	0.125	0.3417	0.1352	0.2194	0.5343	0.6338	0.125	0.1283	0.125	0.2644	0.2311	0.125	0.2089	0.8431	0.125	0.1473	0.0766	0.5945	0.3021	0.2671	0.5052
0.1631	0.0284	0	0.3225	0.1242	0.1761	0	0.081	0	0	0.0591	0.4235	0.0372	0.2656	0.0374	0.1831	0.3999	0.0382	0.0484	0.115	0.0979	0.1236	0.3069	0.0343	0.272	0	0.2179	0.5209	0	0	0.1602	0.029	0.4623	0.1358	0.2614	0	0.1248	0	0.1481	0.03	0	0.029	0.3431	0	0.1595	0.0475	0.3685	0.0306	0.4044	0.1144
0.2092	0.2428	0.0143	0.1777	0.1062	0.5002	0.1283	0.3381	0.125	0.125	0.3001	0.1653	0.0667	0.2338	0.0419	0.3501	0.2613	0.1577	0.1046	0.2856	0.1296	0.1337	0.5349	0.1275	0.497	0.0143	0.6052	0.1309	0.0143	0.125	0.3416	0.0733	0.2242	0.3184	0.5377	0.125	0.186	0.125	0.1189	0.1571	0.125	0.1763	0.4366	0.0143	0.1501	0.1008	0.5522	0.266	0.2001	0.4336
0.1271	0.2992	0	0.2129	0.2473	0.6269	0.0239	0.3588	0.0126	0.1429	0.3251	0.2621	0.1684	0.2286	0.081	0.544	0.3265	0.2006	0.1486	0.4035	0.3192	0.2654	0.5366	0.1277	0.5796	0	0.6654	0.1033	0	0.0126	0.4102	0.1914	0.1872	0.4531	0.7268	0.0126	0.1493	0.0126	0.1849	0.2089	0.0126	0.082	0.614	0	0.2323	0.1084	0.554	0.1931	0.1978	0.536
0.2853	0.3404	0.1429	0.2379	0.168	0.4212	0.0196	0.4846	0	0.1459	0.2639	0.2472	0.2224	0.3141	0.131	0.4808	0.2572	0.2171	0.1197	0.4424	0.2824	0.398	0.4754	0.2291	0.4443	0.1429	0.5283	0.2286	0.1429	0	0.3048	0.1499	0.3035	0.4953	0.5775	0	0.1315	0	0.2874	0.2556	0	0.2204	0.938	0.1429	0.1632	0.0854	0.5697	0.2026	0.3661	0.4725
0.1717	0.1305	0.0741	0.1635	0.1767	0.5164	0.0267	0.3487	0.0065	0.0049	0.2872	0.2222	0.2378	0.2033	0.0654	0.5709	0.3008	0.1279	0.2027	0.4107	0.2677	0.2688	0.4982	0.2234	0.583	0.0741	0.9442	0.1524	0.0741	0.0065	0.3382	0.2356	0.205	0.3748	0.8654	0.0065	0.1772	0.0065	0.1533	0.0678	0.0065	0.2032	0.6438	0.0741	0.2323	0.1336	0.5801	0.1265	0.281	0.6164
0.1091	0.0481	0.4	0.119	0.069	0.2367	0.3333	0.2683	0	0.0364	0.1021	0.0242	0.3421	0.0625	0.0267	0.1103	0.3762	0.0273	0.3123	0.2325	0.0571	0.3691	0.2259	0.3951	0.12	0.4	0.1698	0.0183	0.4	0	0.0627	0.0071	0.0293	0.2932	0.175	0	0.0284	0	0.0822	0.0525	0	0.3548	0.2787	0.4	0.0274	0.0265	0.1091	0.0227	0.0652	0.2208
0	0	0	0	0.0882	0.0221	0.6667	0	1	0	0.0221	0	0	0	0	0.016	0	0	0	0.0221	0	0.0441	0.016	0	0.0176	0	0.0071	0	0	1	0	0	0	0.0294	0.0088	1	0	1	0	0	1	0	0.0126	0	0	0	0.0126	0.6667	0	0.0162
0.1159	0.1194	0.2	0.0558	0.1244	0.3793	0	0.5428	0	0	0.2849	0.246	0.5182	0.2908	0.1337	0.3204	0.1882	0.068	0.1109	0.3404	0.5672	0.4441	0.3406	0.274	0.4695	0.2	0.3894	0.1001	0.2	0	0.3592	0.0867	0.1951	0.3162	0.4504	0	0.1184	0	0.2986	0.1215	0	0.2398	0.4376	0.2	0.4055	0.1072	0.4109	0.0618	0.2721	0.4142
0.2495	0.5039	0	0.0772	0.2796	0.4853	0.0366	0.4718	0.0245	0.1667	0.4063	0.3407	0.0519	0.4271	0.1349	0.4437	0.1876	0.2239	0.082	0.3652	0.4006	0.3913	0.3899	0.0881	0.4794	0	0.4723	0.0991	0	0.0245	0.2404	0.0692	0.1699	0.4059	0.4778	0.0245	0.2498	0.0245	0.3045	0.2783	0.0245	0.2039	0.4987	0	0.1454	0.0694	0.4209	0.2225	0.291	0.4238
0	0.4	0	0	0	0	0.0606	0.3333	0	1	0.1902	0	0	0	0	0.0128	0	0	0.0319	0	0	0	0.0075	0.075	0	0	0.0053	0	0	0	0	0	0	0.3333	0	0	0	0	0	0.6667	0	0	0.0061	0	0	0	0	0	0	0.0103
0.0366	0.3156	0	0.0298	0.0792	0.192	0.4	0.161	0.5	0	0.155	0.112	0.2373	0.4419	0.0343	0.183	0.0715	0.0352	0.0882	0.1028	0.5512	0.0814	0.1487	0.0467	0.1957	0	0.2143	0.0828	0	0.5	0.1993	0.1126	0.1237	0.0939	0.2317	0.5	0.415	0.5	0.0714	0.0274	0.5	0.0263	0.1555	0	0.5	0.0818	0.1473	0.4282	0.079	0.202
0.0488	0.0349	0	0.0397	0.1056	0.2134	0.5	0.184	0.6667	0	0.1492	0.1344	0.2966	0.1303	0.0457	0.1811	0.0834	0.0469	0.1059	0.0912	0.3098	0.0977	0.1611	0.0545	0.2135	0	0.2187	0.1104	0	0.6667	0.2278	0.0938	0.1485	0.1073	0.2428	0.6667	0.098	0.6667	0.0953	0.0343	0.6667	0.0329	0.1659	0	0.6667	0.1091	0.1571	0.5352	0.0948	0.1981
0.1232	0.0639	0.2857	0.0573	0.3312	0.2965	0.261	0.2828	0.2983	0	0.2392	0.1199	0.2915	0.1228	0.0652	0.4555	0.1032	0.0667	0.0432	0.7896	0.1202	0.522	0.3777	0.2808	0.4003	0.2857	0.319	0.0835	0.2857	0.2983	0.1482	0.0347	0.1051	0.7353	0.3632	0.2983	0.08	0.2983	0.1361	0.0571	0.2983	0.3325	0.4614	0.2857	0.0947	0.0453	0.4625	0.3084	0.1386	0.4189
0.6667	0.0461	0.6667	0.1388	0.125	0.1334	0	0.3933	0	0	0.1153	0.0474	0.5176	0.0949	0.0606	0.1192	0.1297	0.0619	0.017	0.3284	0.0839	0.5253	0.1867	0.3662	0.1913	0.6667	0.169	0.1395	0.6667	0	0.1111	0.0133	0.109	0.4018	0.1326	0	0.0493	0	0.1463	0.0454	0	0.5441	0.4121	0.6667	0.0488	0.0461	0.2629	0.0464	0.1297	0.2317
0.0353	0.0161	0	0.0168	0.0685	0.2496	0	0.073	0	0	0.0574	0.0514	0.6667	0.0696	0.0263	0.1144	0.0329	0.027	0.0634	0.0449	0.5657	0.0595	0.0991	0.0318	0.2625	0	0.1764	0.0533	0	0	0.3566	0.0448	0.0683	0.0554	0.1586	0	0.0529	0	0.0847	0.0175	0	0.0169	0.1003	0	0.5932	0.0796	0.0904	0.018	0.0557	0.1043
0.1219	0.3523	0.2	0.0589	0.2665	0.543	0.0326	0.4467	0.0176	0.2	0.3625	0.41	0.312	0.2175	0.0639	0.5432	0.2323	0.2408	0.0816	0.5717	0.2345	0.4278	0.4966	0.2426	0.5173	0.2	0.5529	0.1263	0.2	0.0176	0.4405	0.0583	0.2043	0.6594	0.5575	0.0176	0.1284	0.0176	0.1476	0.2399	0.0176	0.2683	0.4819	0.2	0.261	0.06	0.5264	0.2269	0.2098	0.5444
0.2032	0.0914	0	0.0961	0.5576	0.3734	0.0353	0.1389	0.0441	0	0.2441	0.1799	0.0665	0.1842	0.1142	0.5496	0.1428	0.1168	0.0648	0.6177	0.1717	0.4349	0.4556	0.0375	0.4854	0	0.3478	0.146	0	0.0441	0.1356	0.0521	0.1577	0.75	0.4046	0.0441	0.1109	0.0441	0.2381	0.0913	0.0441	0.132	0.4107	0	0.1656	0.0656	0.4932	0.1111	0.2079	0.352
0.098	0.2674	0.4	0.0183	0.0566	0.0772	0.0303	0.502	0	0.4	0.2249	0.0359	0.3511	0.1809	0.0183	0.0947	0.0358	0.0186	0.0411	0.2887	0.0525	0.3532	0.1564	0.5607	0.1351	0.4	0.0964	0.4	0.4	0	0.3398	0.0144	0.3709	0.5094	0.1054	0	0.1026	0	0.0662	0.3486	0	0.3481	0.3264	0.4	0.0662	0.0331	0.2729	0.0155	0.3094	0.1966
0.1086	0.2677	0	0.3466	0.1123	0.3337	0	0.0568	0	0	0.0653	0.3519	0.0397	0.3695	0.0416	0.2676	0.4178	0.4146	0.3309	0.2409	0.1065	0.1211	0.3694	0.0318	0.3106	0	0.3006	0.235	0	0	0.4369	0.0316	0.3903	0.0897	0.359	0	0.1763	0	0.1342	0.0346	0	0.0335	0.3853	0	0.1267	0.0403	0.3627	0.3455	0.241	0.2201
0.1363	0.3147	0.5	0.1487	0.0862	0.2603	0	0.2791	0	0	0.1205	0.0282	0.4105	0.4062	0.0333	0.1034	0.3334	0.0341	0.0118	0.2764	0.351	0.4306	0.234	0.3087	0.13	0.5	0.1586	0.0228	0.5	0	0.0705	0.0427	0.0342	0.3071	0.183	0	0.3665	0	0.1027	0.0267	0	0.4258	0.2885	0.5	0.0343	0.0331	0.1159	0.0273	0.0761	0.2146
0	0	1	0	0	0	0	0.3333	0	0	0.0794	0	0.6667	0	0	0.0099	0	0	0	0.25	0	0.5	0	0.4109	0	1	0	0	1	0	0	0	0	0.3333	0	0	0.0272	0	0	0	0	0.6667	0.1429	1	0	0.0545	0	0	0	0.1538
0.1062	0.1028	0	0.1041	0.134	0.5224	0	0.1918	0	0	0.1582	0.1781	0.2212	0.1906	0.1043	0.3261	0.1433	0.1078	0.1161	0.3262	0.2916	0.1746	0.4444	0.125	0.3824	0	0.4139	0.1067	0	0	0.2952	0.129	0.1867	0.1627	0.3955	0	0.1186	0	0.1753	0.0894	0	0.1018	0.3282	0	0.4091	0.0966	0.4434	0.0924	0.2318	0.3238
0.0861	0.1936	0.2243	0.0738	0.0714	0.2321	0.1983	0.6086	0.2	0.2	0.4638	0.0379	0.2482	0.1591	0.0238	0.2752	0.2058	0.0244	0.1243	0.3365	0.1007	0.2709	0.2605	0.2934	0.2379	0.2243	0.359	0.0783	0.2243	0.2	0.2231	0.3587	0.1458	0.3732	0.4036	0.2	0.1527	0.2	0.0746	0.2035	0.2	0.2249	0.3552	0.2243	0.1455	0.1019	0.2499	0.204	0.1011	0.4872
0.3101	0.2749	0.25	0.3132	0.0871	0.2319	0.0914	0.4589	0	0.3232	0.2654	0.0348	0.2349	0.0959	0.0364	0.1507	0.361	0.0372	0.0338	0.2451	0.0898	0.3011	0.3487	0.3294	0.2634	0.25	0.3463	0.061	0.25	0	0.0901	0.0261	0.0654	0.4767	0.2674	0	0.0415	0	0.1029	0.3197	0	0.2536	0.4356	0.25	0.0343	0.0225	0.3027	0.033	0.1033	0.3193
0	0	0	0	0.0882	0.0221	0.6667	0	1	0	0.0221	0	0	0	0	0.016	0	0	0	0.0221	0	0.0441	0.016	0	0.0176	0	0.0071	0	0	1	0	0	0	0.0294	0.0088	1	0	1	0	0	1	0	0.0126	0	0	0	0.0126	0.6667	0	0.0162
0.1439	0.2698	0.4	0.4134	0.1288	0.3089	0	0.2986	0	0	0.1194	0.3212	0.3584	0.2432	0.0449	0.2547	0.2728	0.418	0.0319	0.435	0.107	0.4205	0.3342	0.2754	0.3071	0.4	0.2688	0.414	0.4	0	0.3515	0.0202	0.3899	0.3273	0.3222	0	0.1124	0	0.1534	0.0374	0	0.3695	0.5727	0.4	0.0922	0.0415	0.3795	0.3483	0.3716	0.3328
0.1698	0.3525	0	0.0361	0.1621	0.1335	0	0.1062	0	0	0.0639	0.0682	0.0332	0.4119	0.6819	0.1308	0.0538	0.061	0.0391	0.0951	0.2022	0.2594	0.2059	0.0224	0.183	0	0.1106	0.6819	0	0	0.164	0.0251	0.9101	0.1125	0.1537	0	0.1417	0	0.3749	0.5114	0	0.0433	0.2856	0	0.1332	0.0448	0.2972	0.0457	0.5918	0.0989
0	0	0.5107	0	0	0	0	0.2837	0	0	0.0884	0	0.4256	0	0	0.0126	0.0176	0	0.0193	0.2321	0	0.3648	0	0.326	0	0.5107	0	0	0.5107	0	0	0	0	0.2837	0	0	0.0251	0	0	0	0	0.4256	0.1502	0.5107	0	0.0352	0	0	0	0.1596
0.0909	0.4136	0	0.0425	0.1724	0.1186	0	0.0809	0	0	0.0483	0.0423	0.0175	0.2463	1	0.0957	0.0391	0.0682	0.0176	0.0656	0.201	0.2828	0.1145	0.0094	0.1289	0	0.0679	0.0457	0	0	0.0449	0.0123	0.518	0.0761	0.1098	0	0.0284	0	0.4795	0.6667	0	0.043	0.1433	0	0.0685	0.0236	0.0977	0.0455	0.2512	0.074
0.1875	0.1051	0	0.1496	1	0.3652	0.0588	0.0855	0.0882	0	0.2632	0.1154	0.0457	0.1886	0.1724	0.2817	0.1075	0.1765	0.0366	0.3009	0.1631	0.5857	0.3062	0.0194	0.3414	0	0.1827	0.1414	0	0.0882	0.12	0.0321	0.1387	0.3717	0.2244	0.0882	0.0817	0.0882	0.3429	0.1149	0.0882	0.1111	0.2862	0	0.1143	0.0484	0.2578	0.1471	0.2068	0.2249
0	0	0	0	0.0882	0.0221	0.6667	0	1	0	0.0221	0	0	0	0	0.016	0	0	0	0.0221	0	0.0441	0.016	0	0.0176	0	0.0071	0	0	1	0	0	0	0.0294	0.0088	1	0	1	0	0	1	0	0.0126	0	0	0	0.0126	0.6667	0	0.0162
0.1547	0.0396	0	0.1636	0.1148	0.3822	0	0.1779	0	0	0.1547	0.1234	0.2425	0.1532	0.0509	0.1923	0.3849	0.0523	0.0988	0.1013	0.3038	0.121	0.316	0.0708	0.2416	0	0.3661	0.0942	0	0	0.2305	0.4156	0.1349	0.1138	0.3589	0	0.0995	0	0.1385	0.0407	0	0.0392	0.2488	0	0.5171	0.1032	0.1962	0.0418	0.1237	0.2022
0.0294	0.0143	0.0545	0.018	0.0484	0.0691	0	0.1559	0	0	0.3033	0.0505	0.0712	0.0534	0.0236	0.2549	0.0323	0.024	0.1721	0.0426	0.056	0.053	0.0634	0.3329	0.0676	0.0545	0.1272	0.0554	0.0545	0	0.0496	0.1595	0.0596	0.0528	0.1507	0	0.5137	0	0.0545	0.0157	0	0.044	0.0888	0.0545	0.1636	0.8049	0.0607	0.016	0.0413	0.1251
0.1098	0.1672	0.5	0.0895	0.1935	0.203	0.4	0.4031	0.5	0	0.1479	0.0924	0.4339	0.3474	0.2397	0.1757	0.0911	0.1056	0.0294	0.3252	0.3086	0.7385	0.2259	0.3013	0.2495	0.5	0.1477	0.0828	0.5	0.5	0.1072	0.026	0.2016	0.3801	0.2287	0.5	0.0724	0.5	0.5	0.1918	0.5	0.479	0.4034	0.5	0.0714	0.0409	0.2012	0.4845	0.3609	0.2708
0.1815	0.1032	0.25	0.0806	0.3777	0.3565	0.046	0.4328	0.0517	0	0.2769	0.1636	0.2909	0.237	0.1179	0.5007	0.1372	0.0987	0.0712	0.6632	0.2266	0.5959	0.5081	0.2239	0.5319	0.25	0.3544	0.1337	0.25	0.0517	0.129	0.0576	0.1604	0.7587	0.4155	0.0517	0.1054	0.0517	0.2679	0.1048	0.0517	0.329	0.5224	0.25	0.1543	0.0646	0.5329	0.1058	0.2471	0.4542
0	0	0.0953	0	0.0588	0.0196	0.5	0.0408	0.6667	0	0.1023	0	0.0714	0	0	0.042	0	0	0	0.0514	0	0.0924	0.0147	0.0783	0.016	0.0953	0.0068	0	0.0953	0.6667	0	0	0	0.066	0.0084	0.6667	0.0654	0.6667	0	0	0.6667	0.0714	0.0308	0.0953	0	0.1091	0.0118	0.5	0	0.0354
0.2092	0.1974	0.1429	0.197	0.2294	0.566	0.0521	0.3668	0.015	0.0095	0.4354	0.2163	0.3256	0.183	0.076	0.5234	0.1915	0.1955	0.1106	0.5116	0.3182	0.3714	0.4374	0.252	0.5687	0.1429	0.6446	0.0767	0.1429	0.015	0.3348	0.2193	0.1277	0.3497	0.5385	0.015	0.1405	0.015	0.1633	0.0798	0.015	0.3198	0.6099	0.1429	0.2157	0.0998	0.4598	0.1906	0.1744	0.8054
0	0	0	0	0.0882	0.0221	0.6667	0	1	0	0.0221	0	0	0	0	0.016	0	0	0	0.0221	0	0.0441	0.016	0	0.0176	0	0.0071	0	0	1	0	0	0	0.0294	0.0088	1	0	1	0	0	1	0	0.0126	0	0	0	0.0126	0.6667	0	0.0162
0.162	0.0769	0	0.2796	0.3699	0.4801	0.0221	0.121	0.0252	0	0.2159	0.3491	0.0544	0.1812	0.0833	0.5892	0.485	0.0852	0.0599	0.5219	0.1626	0.3371	0.5087	0.0416	0.6276	0	0.5228	0.1041	0	0.0252	0.1369	0.0455	0.1356	0.599	0.5477	0.0252	0.1049	0.0252	0.1966	0.0729	0.0252	0.3112	0.4619	0	0.1388	0.052	0.5254	0.0856	0.1926	0.3383
0.2952	0.3424	0	0.2725	0.1268	0.4949	0	0.0987	0	0	0.102	0.2305	0.035	0.4832	0.0512	0.2804	0.5035	0.2361	0.1008	0.251	0.2835	0.141	0.4653	0.0506	0.5018	0	0.481	0.1797	0	0	0.4345	0.0471	0.3049	0.1354	0.4407	0	0.3201	0	0.1504	0.0465	0	0.2132	0.4725	0	0.1021	0.0337	0.4973	0.2146	0.2353	0.2492
0.1258	0.2877	0.3333	0.103	0.081	0.2664	0.026	0.463	0	0.3333	0.2249	0.0851	0.3047	0.189	0.0298	0.1359	0.2734	0.0872	0.043	0.269	0.0739	0.3436	0.2946	0.2905	0.1631	0.3333	0.1929	0.341	0.3333	0	0.1658	0.0177	0.3355	0.4788	0.2198	0	0.0981	0	0.0961	0.3113	0	0.3105	0.3976	0.3333	0.0666	0.0351	0.268	0.0747	0.3014	0.2284
0.1818	0.0338	0.6667	0.1983	0.1149	0.2893	0	0.3189	0	0	0.1109	0.0338	0.5131	0.0875	0.0445	0.0948	0.3889	0.0455	0.0141	0.2842	0.0761	0.5167	0.2535	0.3602	0.1419	0.6667	0.1609	0.0305	0.6667	0	0.0806	0.0099	0.0411	0.351	0.1917	0	0.0398	0	0.137	0.0333	0	0.5323	0.3077	0.6667	0.0457	0.0442	0.1236	0.0341	0.0913	0.2116
0	0	0	0	0.0882	0.0221	0.6667	0	1	0	0.0221	0	0	0	0	0.016	0	0	0	0.0221	0	0.0441	0.016	0	0.0176	0	0.0071	0	0	1	0	0	0	0.0294	0.0088	1	0	1	0	0	1	0	0.0126	0	0	0	0.0126	0.6667	0	0.0162
0.1518	0.3535	0	0.1203	0.4144	0.4514	0.0252	0.1654	0.0294	0	0.424	0.1834	0.1207	0.557	0.1293	0.5461	0.1459	0.1332	0.0995	0.4518	0.47	0.3843	0.4192	0.0524	0.4504	0	0.342	0.3965	0	0.0294	0.2146	0.3589	0.4204	0.3031	0.3869	0.0294	0.4084	0.0294	0.2362	0.1108	0.0294	0.106	0.4862	0	0.1981	0.0785	0.4612	0.1268	0.4065	0.481
0	0	0	0	0.0882	0.0221	0.6667	0	1	0	0.0221	0	0	0	0	0.016	0	0	0	0.0221	0	0.0441	0.016	0	0.0176	0	0.0071	0	0	1	0	0	0	0.0294	0.0088	1	0	1	0	0	1	0	0.0126	0	0	0	0.0126	0.6667	0	0.0162
0.1183	0.0959	0.2222	0.0864	0.3091	0.4147	0.2088	0.2935	0.232	0	0.2581	0.1527	0.2994	0.3948	0.0941	0.3792	0.1298	0.0969	0.0911	0.4335	0.1988	0.4918	0.5175	0.2626	0.4543	0.2222	0.3489	0.3592	0.2222	0.232	0.3995	0.0825	0.4867	0.4158	0.3944	0.232	0.3141	0.232	0.185	0.0847	0.232	0.2942	0.5633	0.2222	0.1784	0.0733	0.6446	0.2872	0.3784	0.4415
0	0	0	0	0.0882	0.0221	0.6667	0	1	0	0.0221	0	0	0	0	0.016	0	0	0	0.0221	0	0.0441	0.016	0	0.0176	0	0.0071	0	0	1	0	0	0	0.0294	0.0088	1	0	1	0	0	1	0	0.0126	0	0	0	0.0126	0.6667	0	0.0162
0	0	0	0	0.0882	0.0221	0.6667	0	1	0	0.0221	0	0	0	0	0.016	0	0	0	0.0221	0	0.0441	0.016	0	0.0176	0	0.0071	0	0	1	0	0	0	0.0294	0.0088	1	0	1	0	0	1	0	0.0126	0	0	0	0.0126	0.6667	0	0.0162
0.1363	0.3633	0	0.1487	0.0862	0.2943	0	0.0311	0	0	0.0615	0.0849	0.0105	0.4062	0.0333	0.123	0.3334	0.1191	0.0153	0.1104	0.351	0.0972	0.234	0.0217	0.13	0	0.1712	0.0228	0	0	0.113	0.0454	0.0342	0.0571	0.1984	0	0.3559	0	0.1027	0.0267	0	0.0258	0.1847	0	0.0343	0.0173	0.1159	0.0953	0.0761	0.1057
0.0701	0.3929	0.25	0.0159	0.0728	0.2137	0.2424	0.3846	0.25	0.25	0.341	0.2205	0.2371	0.173	0.0228	0.3208	0.0327	0.2558	0.0324	0.622	0.0803	0.2853	0.1562	0.2777	0.1385	0.25	0.1597	0.2558	0.25	0.25	0.2964	0.2126	0.2687	0.407	0.1774	0.25	0.0971	0.25	0.0735	0.2425	0.25	0.2418	0.3863	0.25	0.0502	0.0237	0.2687	0.4496	0.2423	0.3961
0	0	0	0	0.0882	0.0221	0.6667	0	1	0	0.0221	0	0	0	0	0.016	0	0	0	0.0221	0	0.0441	0.016	0	0.0176	0	0.0071	0	0	1	0	0	0	0.0294	0.0088	1	0	1	0	0	1	0	0.0126	0	0	0	0.0126	0.6667	0	0.0162
0	0.4	0	0	0	0	0	0	0	0	0.0259	0	0	0.5	0	0.0188	0	0	0	0.0259	0.4	0	0	0	0	0	0.004	0	0	0	0	0.0517	0	0	0	0	0.5	0	0	0	0	0	0	0	0	0	0	0	0	0.0198
0.1749	0.2611	0	0.0533	0.1042	0.3058	0.026	0.3007	0	0.3333	0.1872	0.0571	0.0291	0.257	0.0442	0.2419	0.0808	0.0451	0.0523	0.2459	0.092	0.111	0.4471	0.0899	0.4195	0	0.3117	0.4184	0	0	0.3194	0.0241	0.4244	0.4779	0.2825	0	0.1583	0	0.121	0.3236	0	0.0973	0.273	0	0.0962	0.0336	0.5554	0.0387	0.4053	0.2159
0.16	0.3021	0	0.0271	0.1215	0.1202	0	0.1099	0	0	0.0575	0.0568	0.0266	0.3433	0.5114	0.1293	0.0461	0.0457	0.0326	0.0968	0.1733	0.2162	0.2006	0.0192	0.1792	0	0.1113	0.536	0	0	0.1435	0.0209	0.7748	0.1125	0.1519	0	0.1181	0	0.2812	0.4091	0	0.0347	0.2759	0	0.0999	0.0336	0.2871	0.0366	0.5096	0.0997
0	0	1	0	0	0	0	0.3333	0	0	0.0794	0	0.6667	0	0	0.0099	0	0	0	0.25	0	0.5	0	0.4109	0	1	0	0	1	0	0	0	0	0.3333	0	0	0.0272	0	0	0	0	0.6667	0.1429	1	0	0.0545	0	0	0	0.1538
0.0434	0.5119	0.4	0.0204	0.0827	0.2273	0.0303	0.5381	0	0.4	0.258	0.045	0.6711	0.1647	0.4053	0.1358	0.0374	0.0327	0.0595	0.2478	0.4629	0.4594	0.1295	0.3197	0.2574	0.4	0.1897	0.0305	0.4	0	0.2501	0.0291	0.321	0.5175	0.1931	0	0.0444	0	0.2087	0.6711	0	0.3591	0.277	0.4	0.251	0.0475	0.1155	0.0272	0.1567	0.2476
0.1626	0.1268	0	0.0769	0.4461	0.3395	0.1961	0.1651	0.0353	0.075	0.2471	0.1542	0.0554	0.1579	0.0913	0.5207	0.1249	0.0934	0.0967	0.5615	0.1502	0.3728	0.4299	0.2828	0.4481	0	0.3643	0.1168	0	0.0353	0.1206	0.0446	0.1351	0.7083	0.387	0.0353	0.0951	0.0353	0.1905	0.1386	0.0353	0.11	0.3921	0	0.1325	0.0525	0.4642	0.0925	0.1782	0.3806
0.1082	0.1431	0	0.1081	0.216	0.4918	0.0213	0.1914	0.0226	0	0.2742	0.2795	0.158	0.1952	0.0485	0.4839	0.2498	0.1592	0.0926	0.3689	0.2605	0.2232	0.4801	0.0876	0.5282	0	0.6401	0.1849	0	0.0226	0.3946	0.1035	0.2338	0.3101	0.621	0.0226	0.1504	0.0226	0.1301	0.0456	0.0226	0.072	0.4361	0	0.1923	0.0885	0.5485	0.1659	0.256	0.4548
0.3018	0.2118	0	0.0651	0.106	0.2033	0.0204	0.2786	0	0.0095	0.2275	0.2288	0.0536	0.38	0.0444	0.3119	0.2054	0.0454	0.0824	0.2059	0.2896	0.1189	0.3206	0.2467	0.2531	0	0.3415	0.2862	0	0	0.3029	0.0764	0.305	0.1759	0.3204	0	0.3197	0	0.1245	0.0443	0	0.0628	0.4377	0	0.1737	0.0838	0.4136	0.0408	0.282	0.2724
0.1067	0.311	0.3333	0.1013	0.155	0.4636	0	0.5011	0	0	0.3614	0.3734	0.4057	0.2223	0.1084	0.5795	0.1326	0.3856	0.1631	0.6085	0.2362	0.4429	0.3196	0.3093	0.3473	0.3333	0.4064	0.0953	0.3333	0	0.3295	0.5468	0.1747	0.3478	0.4652	0	0.1685	0	0.1997	0.0929	0	0.3744	0.5699	0.3333	0.2023	0.1397	0.2963	0.3305	0.1795	0.6819
0.0426	0.0215	0	0.027	0.0732	0.1158	0	0.2143	0	0	0.132	0.0772	0.0845	0.0854	0.0353	0.2797	0.0483	0.0361	0.5	0.0531	0.0893	0.0624	0.1028	0.1377	0.1106	0	0.2149	0.0802	0	0	0.0759	0.2439	0.0923	0.0648	0.2607	0	0.1919	0	0.0882	0.0235	0	0.0227	0.1329	0	0.2647	0.3443	0.0969	0.0241	0.0641	0.1689
0.1355	0.069	0	0.0545	0.3063	0.5457	0.0176	0.122	0.0196	0	0.1986	0.128	0.0527	0.3558	0.0713	0.4741	0.1105	0.0729	0.0599	0.4811	0.1533	0.2941	0.5809	0.0366	0.5552	0	0.4613	0.3361	0	0.0196	0.2412	0.0449	0.4326	0.5415	0.4159	0.0196	0.2056	0.0196	0.1753	0.0642	0.0196	0.2802	0.4513	0	0.1354	0.0489	0.6802	0.0744	0.4019	0.3386
0.1142	0.0663	0.25	0.0567	0.3003	0.3657	0.0196	0.3739	0.0221	0	0.3209	0.1323	0.3953	0.1567	0.0679	0.4985	0.1114	0.0696	0.1131	0.6079	0.26	0.4822	0.4077	0.2675	0.4584	0.25	0.4705	0.0979	0.25	0.0221	0.1938	0.2871	0.1404	0.6945	0.4752	0.0221	0.14	0.0221	0.1457	0.0604	0.0221	0.3049	0.4844	0.25	0.3635	0.1247	0.4457	0.0716	0.1483	0.529
0	0	0.6667	0	0.0588	0.0196	0.5	0.2857	0.6667	0	0.0902	0	0.5	0	0	0.0238	0	0	0	0.2418	0	0.4353	0.0147	0.3424	0.016	0.6667	0.0068	0	0.6667	0.6667	0	0	0	0.3109	0.0084	0.6667	0.0218	0.6667	0	0	0.6667	0.5	0.1451	0.6667	0	0.0363	0.0118	0.5	0	0.1579
0.3413	0.2293	0.2857	0.3275	0.124	0.4221	0	0.274	0	0	0.1177	0.2504	0.2675	0.118	0.051	0.2443	0.2401	0.3146	0.0203	0.4688	0.1091	0.3571	0.3039	0.2278	0.4193	0.2857	0.3657	0.0761	0.2857	0	0.2803	0.0146	0.08	0.3063	0.3039	0	0.0662	0	0.1467	0.0446	0	0.5244	0.5469	0.2857	0.0489	0.0291	0.3595	0.2753	0.1555	0.3563
0.0928	0.4136	0	0.0435	0.1765	0.3274	0	0.0396	0	0	0.0495	0.5084	0.018	0.1124	0.0682	0.2477	0.04	1	0.0181	0.2863	0.0939	0.1498	0.1059	0.0096	0.1195	0	0.1353	0.0466	0	0	0.356	0.0126	0.0525	0.0778	0.1705	0	0.029	0	0.2113	0.0455	0	0.0439	0.2297	0	0.0704	0.024	0.0911	0.6667	0.1173	0.2025
0.0837	0.0174	0.4	0.0093	0.0566	0.2599	0	0.2798	0	0	0.0866	0.0359	0.3511	0.1809	0.0183	0.1021	0.2772	0.0186	0.1221	0.2574	0.0525	0.3532	0.2918	0.2638	0.1493	0.4	0.1694	0.4	0.4	0	0.1274	0.0144	0.3709	0.3094	0.1218	0	0.1152	0	0.0662	0.0152	0	0.3792	0.3143	0.4	0.0662	0.0331	0.3583	0.0155	0.3869	0.2117
0	0.04	0	0	0.0588	0.0196	0.5671	0.0138	0.6667	0.0321	0.0782	0	0	0.0384	0	0.0261	0.0039	0	0.0284	0.0317	0.032	0.0353	0.0163	0.1026	0.016	0	0.0149	0	0	0.6667	0	0.0218	0	0.039	0.0084	0.6667	0.0384	0.6667	0	0.0241	0.6667	0	0.0133	0	0	0	0.0118	0.5	0	0.034
0.1809	0.1121	0	0.1007	0.2999	0.5386	0.016	0.2681	0.0176	0	0.2209	0.1675	0.103	0.3953	0.1151	0.5503	0.1532	0.1054	0.0959	0.5133	0.2439	0.3392	0.7117	0.1029	0.6837	0	0.5431	0.2283	0	0.0176	0.3794	0.0865	0.3709	0.5083	0.5697	0.0176	0.1985	0.0176	0.2413	0.1046	0.0176	0.1139	0.5196	0	0.1835	0.0706	0.8727	0.1038	0.3426	0.4378
0	0	0	0	0.0882	0.0221	0.6667	0	1	0	0.0221	0	0	0	0	0.016	0	0	0	0.0221	0	0.0441	0.016	0	0.0176	0	0.0071	0	0	1	0	0	0	0.0294	0.0088	1	0	1	0	0	1	0	0.0126	0	0	0	0.0126	0.6667	0	0.0162
0.2226	0.1913	0	0.2021	0.2422	0.5219	0	0.3471	0	0	0.2268	0.2166	0.1549	0.4978	0.2367	0.4505	0.379	0.1623	0.271	0.2031	0.4163	0.4122	0.5025	0.1641	0.531	0	0.506	0.2059	0	0	0.4067	0.2441	0.3796	0.2058	0.6362	0	0.2472	0	0.4921	0.2029	0	0.1293	0.5129	0	0.2685	0.2023	0.4568	0.1391	0.4309	0.3868
0	0.075	0	0	0	0	0.3333	0.0625	0	0.1875	0.0347	0	0	0	0	0.0263	0	0	0.072	0	0	0	0.0173	0.4	0	0	0.0324	0	0	0	0	0	0	0.0625	0	0	0	0	0	0.125	0	0	0.0136	0	0	0	0	0	0	0.0624
0	0	1	0	0	0	0	0.3333	0	0	0.0794	0	0.6667	0	0	0.0099	0	0	0	0.25	0	0.5	0	0.4109	0	1	0	0	1	0	0	0	0	0.3333	0	0	0.0272	0	0	0	0	0.6667	0.1429	1	0	0.0545	0	0	0	0.1538
0.151	0.2737	0.3333	0.0713	0.4011	0.4632	0.0252	0.3208	0.0294	0	0.2665	0.3628	0.337	0.1646	0.0875	0.6015	0.1186	0.3818	0.0531	0.8333	0.157	0.6026	0.4141	0.2541	0.4367	0.3333	0.3867	0.1051	0.3333	0.0294	0.2909	0.0422	0.1268	0.8177	0.4468	0.0294	0.0958	0.0294	0.194	0.075	0.0294	0.3894	0.5775	0.3333	0.1222	0.0568	0.4544	0.3398	0.1823	0.5355
0.1303	0.0253	0.4	0.3409	0.0951	0.1543	0	0.2953	0	0	0.1055	0.3634	0.3653	0.2244	0.0307	0.2563	0.5486	0.0313	0.0409	0.2864	0.0823	0.3856	0.3081	0.2808	0.2748	0.4	0.2721	0.42	0.4	0	0.1451	0.0257	0.3974	0.3427	0.3248	0	0.1173	0	0.1115	0.0256	0	0.3582	0.4564	0.4	0.1195	0.0496	0.3654	0.0261	0.3431	0.2239
0.4256	0.5263	0	0.0953	0.124	0.3288	0	0.115	0	0	0.0895	0.3585	0.0427	0.6643	0.0553	0.3042	0.1379	0.424	0.0475	0.2966	0.3645	0.1318	0.326	0.0408	0.2643	0	0.2893	0.2713	0	0	0.4551	0.0635	0.417	0.1315	0.2751	0	0.468	0	0.147	0.0461	0	0.0446	0.4276	0	0.1304	0.0425	0.4115	0.3533	0.2501	0.2538
0.04	0.0201	0	0.0252	0.0682	0.1055	0	0.0587	0	0	0.0433	0.1699	0.0779	0.0787	0.033	0.2647	0.0987	0.0337	0.0698	0.2671	0.0823	0.0576	0.0943	0.0375	0.1013	0	0.1544	0.0754	0	0	0.0706	0.0549	0.0856	0.3505	0.1877	0	0.0655	0	0.0811	0.022	0	0.0213	0.2096	0	0.2432	0.0938	0.202	0.0225	0.0594	0.0856
0.2704	0.335	0.0442	0.1021	0.2667	0.5545	0.0298	0.2847	0.016	0.1818	0.2921	0.2407	0.0777	0.1491	0.0679	0.4954	0.3864	0.2289	0.1031	0.543	0.1454	0.3023	0.4458	0.0977	0.4649	0.0442	0.5036	0.0869	0.0442	0.016	0.2464	0.0323	0.1062	0.6239	0.4683	0.016	0.0797	0.016	0.1624	0.2289	0.016	0.2612	0.5196	0.0442	0.0855	0.0358	0.4703	0.2171	0.1661	0.3906
0.0803	0.3437	0.2077	0.0406	0.2614	0.3655	0.2064	0.3658	0.2088	0.2	0.3125	0.2281	0.2247	0.3323	0.053	0.3317	0.0752	0.2296	0.0541	0.4335	0.1147	0.4277	0.4051	0.2149	0.3197	0.2077	0.2712	0.3042	0.2077	0.2088	0.4114	0.0307	0.4128	0.508	0.3059	0.2088	0.27	0.2088	0.131	0.23	0.2088	0.2481	0.496	0.2077	0.1021	0.0472	0.4462	0.3905	0.3202	0.3818
0.3056	0.2475	0.1538	0.2659	0.2974	0.518	0.0271	0.3968	0.0136	0.0066	0.2785	0.2707	0.2394	0.3087	0.1508	0.5638	0.2795	0.2438	0.1197	0.5431	0.3111	0.5239	0.5498	0.2255	0.5287	0.1538	0.5781	0.1215	0.1538	0.0136	0.3096	0.1608	0.2051	0.4959	0.639	0.0136	0.1245	0.0136	0.3231	0.1431	0.0136	0.2448	0.9695	0.1538	0.1719	0.0914	0.5846	0.2326	0.2959	0.5485
0	0	0.5	0	0.0441	0.2292	0.4	0.25	0.5	0	0.0811	0	0.4	0	0	0.0515	0	0	0	0.256	0	0.3627	0.189	0.2935	0.0659	0.5	0.102	0	0.5	0.5	0.0221	0	0	0.32	0.0414	0.5	0.0476	0.5	0	0	0.5	0.4462	0.136	0.5	0	0.0272	0.1535	0.4	0.0904	0.1824
0.1011	0.0658	0.0978	0.0481	0.108	0.3463	0.0133	0.4312	0	0.0061	0.3383	0.1044	0.2118	0.1897	0.0583	0.4899	0.0924	0.0599	0.2638	0.282	0.1962	0.2223	0.4574	0.2971	0.4172	0.0978	0.5582	0.1785	0.0978	0	0.24	0.2945	0.2305	0.2948	0.5319	0	0.3183	0	0.1318	0.0576	0	0.2412	0.5056	0.0978	0.2464	0.2375	0.4178	0.0572	0.2168	0.5059
0.0928	0.4136	0	0.0435	0.1765	0.3274	0	0.0396	0	0	0.0495	0.5084	0.018	0.1124	0.0682	0.2477	0.04	1	0.0181	0.2863	0.0939	0.1498	0.1059	0.0096	0.1195	0	0.1353	0.0466	0	0	0.356	0.0126	0.0525	0.0778	0.1705	0	0.029	0	0.2113	0.0455	0	0.0439	0.2297	0	0.0704	0.024	0.0911	0.6667	0.1173	0.2025
0.1114	0.328	0.2222	0.0742	0.3417	0.5716	0.0176	0.2982	0.0196	0	0.2544	0.3253	0.2442	0.4668	0.1554	0.411	0.1058	0.3543	0.0497	0.5274	0.2836	0.6251	0.4248	0.1959	0.5732	0.2222	0.3638	0.1741	0.2222	0.0196	0.4095	0.0373	0.3566	0.4307	0.4082	0.0196	0.1919	0.0196	0.3577	0.1399	0.0196	0.4748	0.5709	0.2222	0.1144	0.045	0.4156	0.3277	0.3999	0.4546
0.2611	0.3863	0	0.0624	0.1879	0.1489	0	0.3264	0	0	0.0692	0.0631	0.0251	0.3187	0.7404	0.1411	0.0591	0.0873	0.0248	0.1235	0.2707	0.3504	0.2971	0.014	0.3124	0	0.1085	0.1602	0	0	0.0655	0.0189	0.4951	0.145	0.1561	0	0.0436	0	0.5188	0.5553	0	0.062	0.2263	0	0.0741	0.0281	0.2616	0.0654	0.3548	0.1129
0.1047	0.3056	0	0.0117	0.0927	0.0876	0.4	0.0648	0.5	0	0.0667	0.0419	0.0213	0.5444	0.0228	0.1131	0.0311	0.0233	0.0267	0.0926	0.3457	0.0935	0.1665	0.0158	0.1406	0	0.0956	0.5	0	0.5	0.1323	0.0512	0.4327	0.084	0.1064	0.5	0.4439	0.5	0.0828	0.0183	0.5	0.0177	0.2144	0	0.0828	0.0277	0.2607	0.4186	0.3609	0.0927
0.1225	0.3056	0	0.0229	0.0707	0.0849	0.0364	0.3148	0	0.5	0.1893	0.0419	0.0213	0.211	0.0228	0.0978	0.0409	0.0233	0.048	0.1176	0.06	0.0788	0.1684	0.3551	0.1464	0	0.1	0.5	0	0	0.3822	0.0168	0.4327	0.323	0.1102	0	0.1106	0	0.0828	0.4183	0	0.0177	0.2218	0	0.0828	0.0277	0.29	0.0186	0.3609	0.0763
0.1464	0.0342	0	0.0301	0.1032	0.3108	0.4	0.0822	0.5	0	0.0463	0.0341	0.012	0.0669	0.0394	0.2257	0.0344	0.0402	0.0122	0.2558	0.0609	0.1036	0.4079	0.0076	0.2986	0	0.2249	0.0919	0	0.5	0.0765	0.0095	0.0794	0.3096	0.1807	0.5	0.0756	0.5	0.0928	0.0316	0.5	0.1154	0.1305	0	0.0309	0.0132	0.3503	0.4322	0.1829	0.2009
0.1991	0.2962	0.3333	0.038	0.1158	0.1549	0.026	0.6603	0	0.3333	0.2405	0.0598	0.3105	0.2954	0.0945	0.2405	0.0538	0.0534	0.0461	0.4045	0.1685	0.453	0.4095	0.2825	0.4078	0.3333	0.1949	0.4002	0.3333	0	0.1374	0.0205	0.397	0.6757	0.2262	0	0.1199	0	0.238	0.3667	0	0.3711	0.3943	0.3333	0.0783	0.037	0.4528	0.0458	0.4217	0.3221
0.1605	0.3654	0.4	0.1739	0.1724	0.4769	0	0.3706	0	0	0.1952	0.1838	0.4583	0.4966	0.1248	0.3383	0.3591	0.1289	0.0969	0.3538	0.4779	0.4942	0.4231	0.3092	0.3513	0.4	0.3428	0.1041	0.4	0	0.1925	0.1265	0.1866	0.3738	0.3936	0	0.3926	0	0.2229	0.104	0	0.4326	0.4764	0.4	0.1955	0.0891	0.2992	0.1074	0.1931	0.415
0.0711	0.3478	0	0.0321	0.1368	0.338	0	0.3419	0	0	0.2919	0.4214	0.0845	0.1118	0.0516	0.3042	0.0429	0.673	0.1249	0.271	0.1394	0.1338	0.1274	0.0954	0.1513	0	0.2537	0.0422	0	0	0.3458	0.0895	0.0633	0.0879	0.3074	0	0.1281	0	0.1641	0.0387	0	0.0374	0.2529	0	0.3491	0.1909	0.1132	0.5047	0.1078	0.3802
0	0	1	0	0	0	0	0.3333	0	0	0.0794	0	0.6667	0	0	0.0099	0	0	0	0.25	0	0.5	0	0.4109	0	1	0	0	1	0	0	0	0	0.3333	0	0	0.0272	0	0	0	0	0.6667	0.1429	1	0	0.0545	0	0	0	0.1538
0.0732	0.0419	0	0.0596	0.1143	0.229	0	0.2147	0	0	0.1568	0.1681	0.3955	0.1628	0.0685	0.1895	0.1001	0.0704	0.1323	0.0916	0.3717	0.1	0.1678	0.0654	0.226	0	0.224	0.1656	0	0	0.2657	0.1172	0.1856	0.1104	0.2505	0	0.1225	0	0.1429	0.0457	0	0.0439	0.1714	0	1	0.1636	0.162	0.0469	0.1185	0.2039
0	0.4	0	0	0	0	0.0606	0.3333	0	1	0.1902	0	0	0	0	0.0128	0	0	0.0319	0	0	0	0.0075	0.075	0	0	0.0053	0	0	0	0	0	0	0.3333	0	0	0	0	0	0.6667	0	0	0.0061	0	0	0	0	0	0	0.0103
0.133	0.102	0.25	0.09	0.1391	0.3897	0.0352	0.3288	0	0.0144	0.1656	0.2112	0.336	0.1885	0.0934	0.4069	0.1654	0.0963	0.0994	0.4045	0.2029	0.3757	0.3661	0.4375	0.3864	0.25	0.3949	0.1062	0.25	0	0.3348	0.0932	0.1721	0.4072	0.4295	0	0.1117	0	0.1765	0.0913	0	0.3802	0.4407	0.25	0.1822	0.0787	0.3762	0.0856	0.3672	0.4151
0.1004	0.2598	0	0.0466	0.1001	0.2905	0.2906	0.0404	0.339	0	0.2274	0.278	0.0211	0.2203	0.033	0.3553	0.0716	0.3439	0.03	0.4025	0.1021	0.1094	0.192	0.0449	0.2479	0	0.2382	0.1168	0	0.339	0.4562	0.2706	0.1995	0.0835	0.2624	0.339	0.1237	0.339	0.1017	0.0283	0.339	0.0478	0.2677	0	0.0701	0.0286	0.2745	0.5853	0.1604	0.4206
0.0462	0.0257	0.2857	0.0226	0.0672	0.2751	0	0.2349	0	0	0.0979	0.1021	0.2945	0.2791	0.0269	0.2514	0.1479	0.0275	0.2711	0.412	0.0822	0.303	0.2412	0.429	0.3219	0.2857	0.264	0.1743	0.2857	0	0.3771	0.037	0.3107	0.4314	0.2425	0	0.1665	0	0.0801	0.0235	0	0.5071	0.3636	0.2857	0.1168	0.0493	0.3712	0.0241	0.1933	0.2357
0.1626	0.0799	0	0.0769	0.4461	0.3714	0.0294	0.1235	0.0353	0	0.2219	0.1542	0.0554	0.1579	0.0913	0.5183	0.1249	0.0934	0.0556	0.5716	0.1502	0.3728	0.4481	0.0328	0.4607	0	0.4056	0.1168	0	0.0353	0.1268	0.0446	0.1351	0.679	0.4691	0.0353	0.1031	0.0353	0.1905	0.0761	0.0353	0.1373	0.3865	0	0.1325	0.0525	0.4848	0.0925	0.448	0.3389
0.1035	0.1216	0.2472	0.0513	0.2262	0.2558	0.0136	0.3366	0.0147	0.0263	0.3692	0.0998	0.2644	0.2676	0.1074	0.4006	0.1194	0.0633	0.05	0.5391	0.2016	0.5285	0.3637	0.2286	0.3617	0.2472	0.3037	0.2138	0.2472	0.0147	0.1225	0.0315	0.2844	0.6131	0.3781	0.0147	0.119	0.0147	0.2313	0.1234	0.0147	0.2976	0.5522	0.2472	0.0809	0.0642	0.4663	0.0652	0.3372	0.3949
0.1158	0.1131	0.4	0.1162	0.162	0.3731	0	0.5061	0	0	0.199	0.1904	0.4827	0.2067	0.1212	0.3618	0.1479	0.1252	0.1796	0.3409	0.2243	0.4854	0.3399	0.3485	0.3713	0.4	0.3424	0.1155	0.4	0	0.1852	0.2838	0.2017	0.3781	0.3966	0	0.1605	0	0.2106	0.101	0	0.4297	0.6325	0.4	0.2682	0.1685	0.3197	0.1043	0.1843	0.4782
0.1818	0.1316	0	0.2768	0.1766	0.3674	0.0526	0.2618	0	0.0176	0.3374	0.1648	0.1164	0.2993	0.108	0.6922	0.3047	0.1111	0.218	0.4302	0.2506	0.2101	0.5398	0.1564	0.6128	0	0.5631	0.1602	0	0	0.3362	0.392	0.2585	0.3095	0.6323	0	0.2218	0	0.2196	0.1043	0	0.1092	0.4804	0	0.1981	0.1505	0.5402	0.0988	0.2362	0.5479
0.2273	0.1062	0.0374	0.1809	0.249	0.4919	0.0126	0.1674	0.0136	0	0.199	0.3438	0.1746	0.2597	0.1135	0.3973	0.3982	0.0731	0.0547	0.3252	0.3803	0.3699	0.4049	0.1016	0.5992	0.0374	0.5005	0.0878	0.0374	0.0136	0.2604	0.0391	0.1663	0.3034	0.488	0.0136	0.1136	0.0136	0.2619	0.1054	0.0136	0.2364	0.4944	0.0374	0.1693	0.0436	0.5095	0.0742	0.2556	0.2829
0.2404	0.1967	0.2039	0.2351	0.0913	0.3475	0.069	0.4172	0	0.0101	0.3959	0.1934	0.2322	0.1313	0.0375	0.4505	0.3022	0.2054	0.1917	0.46	0.1376	0.2787	0.3454	0.2938	0.2791	0.2039	0.4893	0.0589	0.2039	0	0.2268	0.2567	0.0775	0.2664	0.4935	0	0.1276	0	0.1084	0.0437	0	0.2203	0.5267	0.2039	0.1376	0.104	0.3133	0.1883	0.1078	0.5421
0	0.5714	0.5	0	0	0	0.0364	0.5	0	0.5	0.2363	0	0.4	0.3333	0	0.0352	0	0	0.0212	0.2207	0.2857	0.3333	0.0064	0.3471	0	0.5	0.0068	0	0.5	0	0	0.0345	0	0.5	0	0	0.3515	0	0	0.4	0	0.4	0.1304	0.5	0	0.0272	0	0	0	0.156
0	0	0	0	0.0882	0.0221	0.6667	0	1	0	0.0221	0	0	0	0	0.016	0	0	0	0.0221	0	0.0441	0.016	0	0.0176	0	0.0071	0	0	1	0	0	0	0.0294	0.0088	1	0	1	0	0	1	0	0.0126	0	0	0	0.0126	0.6667	0	0.0162
0	0	0	0	0.0882	0.0221	0.6667	0	1	0	0.0221	0	0	0	0	0.016	0	0	0	0.0221	0	0.0441	0.016	0	0.0176	0	0.0071	0	0	1	0	0	0	0.0294	0.0088	1	0	1	0	0	1	0	0.0126	0	0	0	0.0126	0.6667	0	0.0162
0	0	0.0769	0	0	0.0193	0	0.0256	0	0	0.0411	0	0.0513	0	0	0.0163	0	0	0	0.0228	0	0.0384	0.0159	0.0459	0.0134	0.0769	0.0087	0	0.0769	0	0.0091	0	0	0.0303	0.0049	0	0.0446	0	0	0	0	0.063	0.011	0.0769	0	0.0756	0.0125	0	0.0175	0.0158
0.1648	0.2888	0.0218	0.0323	0.1028	0.1545	0.0303	0.4142	0	0.4	0.3613	0.0607	0.0495	0.2216	0.0454	0.3562	0.0528	0.0463	0.1333	0.2426	0.0953	0.1154	0.3212	0.3139	0.3185	0.0218	0.2511	0.4478	0.0218	0	0.1519	0.1024	0.4132	0.5098	0.2696	0	0.3411	0	0.1183	0.3712	0	0.1025	0.2674	0.0218	0.1113	0.4164	0.3835	0.0386	0.3625	0.2648
0.0717	0.4936	0	0.0462	0.1243	0.4281	0.0151	0.5372	0	0.1818	0.4586	0.2006	0.0659	0.2805	0.2519	0.428	0.0692	0.2179	0.1487	0.3416	0.2924	0.2824	0.3331	0.1209	0.2621	0	0.428	0.0531	0	0	0.2268	0.3574	0.2461	0.2655	0.4777	0	0.149	0	0.3026	0.3976	0	0.0626	0.4014	0	0.189	0.1198	0.3014	0.1998	0.3105	0.5711
0.1097	0.2437	0.1053	0.1567	0.2017	0.4641	0.0179	0.484	0.0093	0.1053	0.3707	0.2849	0.2522	0.2037	0.0739	0.6499	0.2561	0.1623	0.2472	0.4864	0.245	0.3184	0.4877	0.2519	0.5651	0.1053	0.8355	0.1059	0.1053	0.0093	0.346	0.2335	0.1764	0.5324	0.9078	0.0093	0.1873	0.0093	0.1594	0.1702	0.0093	0.1833	0.6192	0.1053	0.2497	0.1564	0.553	0.1586	0.2635	0.6126
0.1347	0.2554	0	0.0937	0.3155	0.515	0.2088	0.152	0.232	0	0.3576	0.3096	0.0966	0.2122	0.1011	0.7305	0.1366	0.2865	0.0844	0.8289	0.2235	0.3159	0.4746	0.0921	0.4987	0	0.4747	0.1024	0	0.232	0.3242	0.262	0.1619	0.5084	0.5326	0.232	0.1185	0.232	0.1922	0.091	0.232	0.1026	0.5229	0	0.1554	0.0622	0.5387	0.4579	0.1889	0.5979
0.0276	0.0112	0	0.0094	0.0573	0.1055	0	0.3715	0	0	0.2914	0.0315	0.1037	0.0516	0.0184	0.1312	0.0209	0.0189	0.147	0.0352	0.0968	0.0492	0.0808	0.1097	0.0979	0	0.1648	0.0333	0	0	0.0671	0.1056	0.0463	0.0438	0.1975	0	0.1453	0	0.0698	0.0123	0	0.0119	0.0895	0	0.4884	0.2743	0.0726	0.0126	0.0432	0.2435
0.1698	0.3525	0	0.0361	0.1621	0.1335	0	0.1062	0	0	0.0639	0.0682	0.0332	0.4119	0.6819	0.1308	0.0538	0.061	0.0391	0.0951	0.2022	0.2594	0.2059	0.0224	0.183	0	0.1106	0.6819	0	0	0.164	0.0251	0.9101	0.1125	0.1537	0	0.1417	0	0.3749	0.5114	0	0.0433	0.2856	0	0.1332	0.0448	0.2972	0.0457	0.5918	0.0989
0.0555	0.3838	0.25	0.0308	0.0858	0.3371	0.0202	0.4628	0	0.25	0.273	0.4651	0.3666	0.1269	0.0358	0.3794	0.2271	0.2692	0.0817	0.4206	0.2181	0.3002	0.2005	0.4372	0.3338	0.25	0.3416	0.0618	0.25	0	0.5116	0.0575	0.1016	0.4599	0.3698	0	0.1198	0	0.1032	0.2541	0	0.2942	0.365	0.25	0.2906	0.0611	0.2151	0.2393	0.1114	0.3972
0.1115	0.2843	0.1429	0.1776	0.1139	0.4893	0.0121	0.3667	0	0.1429	0.2388	0.2046	0.3109	0.1831	0.0633	0.4216	0.1732	0.1824	0.0902	0.4287	0.2781	0.2705	0.503	0.3197	0.5041	0.1429	0.5847	0.1862	0.1429	0	0.4426	0.1598	0.2311	0.4559	0.5207	0	0.1285	0	0.1416	0.1924	0	0.2173	0.545	0.1429	0.1819	0.0785	0.5405	0.1703	0.2725	0.5062
0.417	0.2837	0	0.4092	0.2203	0.7214	0	0.1833	0	0	0.1569	0.3557	0.1068	0.2537	0.1272	0.4438	0.4634	0.3655	0.0909	0.3206	0.2631	0.2518	0.5507	0.0645	0.5865	0	0.5753	0.1206	0	0	0.365	0.0863	0.1879	0.2086	0.5518	0	0.1118	0	0.2745	0.1113	0	0.3157	0.6121	0	0.1781	0.0694	0.4927	0.3198	0.2581	0.3952
[truncated: 221 more columns]

## Sheet: miRNA ID
1	hsa-mir-217
2	hsa-mir-140
3	hsa-mir-520h
4	hsa-mir-498
5	hsa-mir-149
6	hsa-mir-34c
7	hsa-mir-433
8	hsa-mir-22
9	hsa-mir-612
10	hsa-mir-379
11	hsa-mir-206
12	hsa-mir-124
13	hsa-mir-382
14	hsa-mir-193b
15	hsa-mir-188
16	hsa-mir-9
17	hsa-mir-31
18	hsa-mir-33a
19	hsa-mir-96
20	hsa-mir-30b
21	hsa-mir-181d
22	hsa-mir-499
23	hsa-mir-141
24	hsa-mir-342
25	hsa-mir-127
26	hsa-mir-325
27	hsa-mir-20a
28	hsa-mir-376b
29	hsa-mir-331
30	hsa-mir-600
31	hsa-mir-224
32	hsa-mir-26b
33	hsa-mir-449b
34	hsa-mir-320
35	hsa-mir-18a
36	hsa-mir-629
37	hsa-mir-363
38	hsa-mir-622
39	hsa-mir-455
40	hsa-mir-495
41	hsa-mir-518b
42	hsa-mir-520c
43	hsa-let-7d
44	hsa-mir-523
45	hsa-mir-660
46	hsa-mir-561
47	hsa-mir-200b
48	hsa-mir-197
49	hsa-mir-491
50	hsa-mir-29a
51	hsa-let-7g
52	hsa-mir-139
53	hsa-mir-203
54	hsa-mir-190
55	hsa-mir-652
56	hsa-mir-421
57	hsa-mir-221
58	hsa-mir-638
59	hsa-mir-153
60	hsa-mir-132
61	hsa-mir-99b
62	hsa-mir-19a
63	hsa-mir-92a
64	hsa-mir-449a
65	hsa-mir-516a
66	hsa-mir-302d
67	hsa-mir-155
68	hsa-mir-373
69	hsa-mir-101
70	hsa-mir-525
71	hsa-mir-25
72	hsa-mir-451
73	hsa-mir-145
74	hsa-mir-302a
75	hsa-mir-346
76	hsa-mir-507
77	hsa-mir-658
78	hsa-mir-211
79	hsa-mir-550
80	hsa-mir-516b
81	hsa-mir-142
82	hsa-mir-486
83	hsa-mir-146a
84	hsa-mir-539
85	hsa-mir-93
86	hsa-mir-216b
87	hsa-mir-20b
88	hsa-mir-596
89	hsa-let-7i
90	hsa-mir-557
91	hsa-mir-494
92	hsa-mir-30c
93	hsa-mir-151
94	hsa-mir-371
95	hsa-mir-431
96	hsa-mir-302c
97	hsa-mir-181c
98	hsa-mir-429
99	hsa-mir-381
100	hsa-mir-297
101	hsa-mir-642
102	hsa-mir-10a
103	hsa-mir-518c
104	hsa-mir-34b
105	hsa-mir-521
106	hsa-mir-136
107	hsa-let-7b
108	hsa-mir-222
109	hsa-mir-21
110	hsa-mir-377
111	hsa-mir-184
112	hsa-mir-10b
113	hsa-mir-23a
114	hsa-mir-23b
115	hsa-let-7a
116	hsa-mir-33b
117	hsa-mir-769
118	hsa-mir-367
119	hsa-mir-154
120	hsa-mir-204
121	hsa-mir-515
122	hsa-mir-106b
123	hsa-mir-300
124	hsa-mir-199a
125	hsa-mir-520d
126	hsa-mir-128b
127	hsa-mir-520b
128	hsa-mir-150
129	hsa-mir-337
130	hsa-mir-520e
131	hsa-mir-487b
132	hsa-mir-26a
133	hsa-mir-215
134	hsa-mir-514
135	hsa-mir-1
136	hsa-mir-196a
137	hsa-mir-212
138	hsa-mir-452
139	hsa-mir-376a
140	hsa-mir-448
141	hsa-mir-15a
142	hsa-mir-510
143	hsa-mir-219
144	hsa-mir-122
145	hsa-mir-659
146	hsa-mir-520a
147	hsa-mir-497
148	hsa-mir-423
149	hsa-mir-143
150	hsa-mir-323
151	hsa-mir-152
152	hsa-mir-526a
153	hsa-mir-103
154	hsa-mir-330
155	hsa-let-7e
156	hsa-mir-137
157	hsa-mir-223
158	hsa-mir-34a
159	hsa-let-7c
160	hsa-mir-17
161	hsa-mir-133b
162	hsa-mir-602
163	hsa-mir-181a
164	hsa-mir-146b
165	hsa-mir-501
166	hsa-mir-663
167	hsa-mir-575
168	hsa-mir-296
169	hsa-mir-186
170	hsa-mir-370
171	hsa-mir-125a
172	hsa-mir-488
173	hsa-mir-28
174	hsa-mir-183
175	hsa-mir-129
176	hsa-mir-520f
177	hsa-mir-196b
178	hsa-mir-195
179	hsa-mir-107
180	hsa-mir-611
181	hsa-mir-192
182	hsa-mir-301b
183	hsa-mir-208
184	hsa-mir-409
185	hsa-mir-453
186	hsa-mir-185
187	hsa-mir-378
188	hsa-mir-542
189	hsa-mir-130b
190	hsa-mir-302b
191	hsa-mir-208b
192	hsa-mir-29b
193	hsa-mir-583
194	hsa-mir-135b
195	hsa-mir-106a
196	hsa-mir-148a
197	hsa-mir-340
198	hsa-mir-615
199	hsa-mir-7
200	hsa-mir-654
201	hsa-mir-200c
202	hsa-mir-662
203	hsa-mir-601
204	hsa-mir-148b
205	hsa-mir-30a
206	hsa-mir-324
207	hsa-mir-598
208	hsa-mir-100
209	hsa-mir-375
210	hsa-mir-520g
211	hsa-mir-299
212	hsa-mir-338
213	hsa-mir-125b
214	hsa-mir-15b
215	hsa-mir-30e
216	hsa-mir-128a
217	hsa-mir-194
218	hsa-mir-339
219	hsa-mir-500
220	hsa-mir-32
221	hsa-mir-220
222	hsa-mir-424
223	hsa-mir-134
224	hsa-mir-200a
225	hsa-mir-608
226	hsa-mir-18b
227	hsa-mir-328
228	hsa-mir-512
229	hsa-mir-218
230	hsa-mir-135a
231	hsa-mir-95
232	hsa-mir-532
233	hsa-mir-214
234	hsa-mir-210
235	hsa-let-7f
236	hsa-mir-365
237	hsa-mir-16
238	hsa-mir-216a
239	hsa-mir-205
240	hsa-mir-144
241	hsa-mir-484
242	hsa-mir-376c
243	hsa-mir-99a
244	hsa-mir-130a
245	hsa-mir-27a
246	hsa-mir-27b
247	hsa-mir-526b
248	hsa-mir-454
249	hsa-mir-362
250	hsa-mir-372
251	hsa-mir-198
252	hsa-mir-182
253	hsa-mir-383
254	hsa-mir-133a
255	hsa-mir-98
256	hsa-mir-92b
257	hsa-mir-181b
258	hsa-mir-24
259	hsa-mir-432
260	hsa-mir-637
261	hsa-mir-657
262	hsa-mir-411
263	hsa-mir-335
264	hsa-mir-29c
265	hsa-mir-19b
266	hsa-mir-30d
267	hsa-mir-187
268	hsa-mir-301a
269	hsa-mir-199b
270	hsa-mir-126
271	hsa-mir-191
